# Supplementary material for: Microbial Communities in Model Seawater-Compensated Fuel Ballast Tanks: Biodegradation and Biocorrosion Stimulated by Marine Sediments
Source: MDPI journal article supplement (doi:10.3390/cmd5010001), 2024-01-03

Figure S2. EDX graph. Two sites (labeled as site A and site B) were selected for each coupon for EDX analysis. Two  $1\text{ }\mu\text{m} \times 1\text{ }\mu\text{m}$  scan areas per coupon were examined, with 4 to 7 points examined in each scan area. In total, 8 to 14 spectra were obtained for each coupon. The % weight of oxygen, iron, sulfur and carbon was plotted below as the mean value and  $\pm 1$  STD error bars. R1, R2: petro-F76. R3, R4: FT-F76. R5, R6: fuel mix. R7, R8: no fuel.

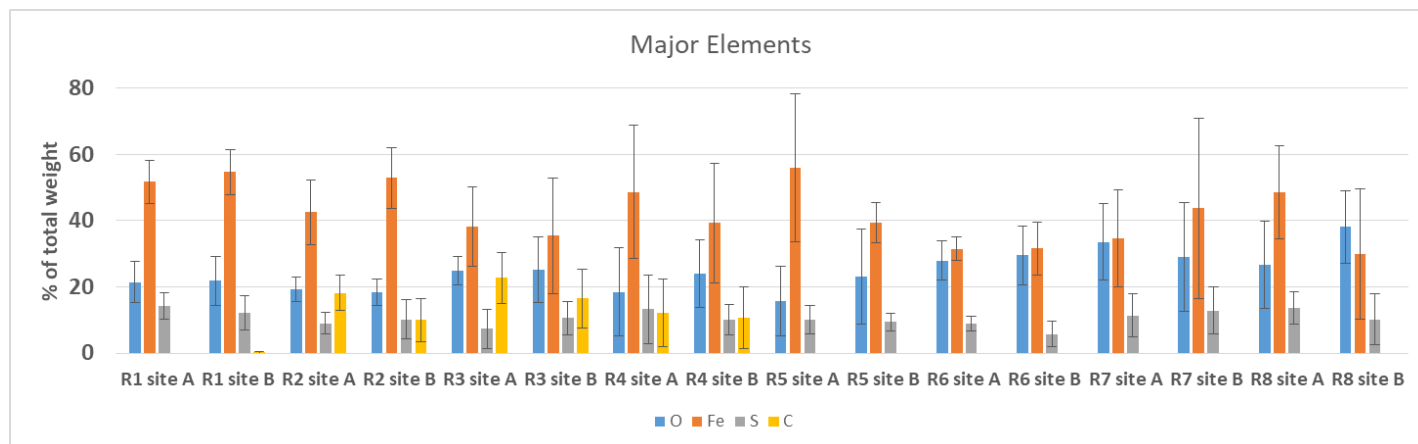

Supplement: s1 [file s1]
