# Supplementary material for: Microbial Communities in Model Seawater-Compensated Fuel Ballast Tanks: Biodegradation and Biocorrosion Stimulated by Marine Sediments
Source: MDPI journal article supplement (doi:10.3390/cmd5010001), 2024-01-03
Supplement: s1 [file s1]

Table S5. Microbial community composition of the reactor sediment and coupon samples. Relative abundance (%) of taxa within 16S rRNA. R1, R2: petro-F76 fuel. R3, R4: FT-F76 fuel. R5, R6: mix of petro- and FT-F76 fuel. R7, R8: no fuel added. The R5sed sample had less than the threshold number of reads so was not analyzed. Green cells indicates relative abundance of at least 5%.

A. Sediments. Phylum level taxa, with the exception of Alphaproteobacteria and Gammaproteobacteria (Class level).

| Taxon                  | R1sed | R2sed | R3sed | R4sed | R6sed | R7sed | R8sed |
|------------------------|-------|-------|-------|-------|-------|-------|-------|
| Acetothermia           | 0.0   | 0.0   | 0.0   | 0.0   | 0.0   | 0.2   | 0.2   |
| Actinobacteriota       | 4.0   | 2.8   | 2.0   | 3.2   | 0.4   | 2.6   | 0.8   |
| Bacteroidota           | 3.9   | 3.4   | 7.7   | 2.6   | 11.3  | 9.7   | 7.3   |
| Campylobacterota       | 10.0  | 2.8   | 4.7   | 2.3   | 6.9   | 3.8   | 1.8   |
| Chloroflexi            | 0.6   | 0.9   | 0.7   | 3.3   | 0.7   | 1.6   | 2.2   |
| Cyanobacteria          | 1.0   | 1.0   | 1.1   | 6.8   | 19.4  | 1.0   | 6.0   |
| Deferribacterota       | 7.5   | 0.3   | 0.0   | 0.0   | 0.0   | 0.0   | 0.0   |
| Desulfobacterota       | 29.4  | 45.9  | 43.3  | 30.2  | 21.6  | 36.7  | 27.5  |
| Elusimicrobiota        | 0.0   | 0.1   | 0.0   | 0.0   | 0.0   | 1.3   | 0.0   |
| Firmicutes             | 11.8  | 21.5  | 6.8   | 7.3   | 19.9  | 6.3   | 10.2  |
| *Alpha Proteobacteria  | 6.1   | 12.3  | 8.1   | 27.5  | 6.8   | 8.7   | 25.6  |
| * Gamma Proteobacteria | 17.4  | 4.5   | 14.5  | 13.4  | 10.8  | 14.9  | 16.2  |
| Spirochaetota          | 1.9   | 0.3   | 1.8   | 0.2   | 0.5   | 5.8   | 0.1   |
| Synergistota           | 0.1   | 0.6   | 0.1   | 0.2   | 0.0   | 0.0   | 0.0   |
| Thermotogota           | 0.3   | 1.9   | 0.4   | 0.3   | 0.3   | 0.1   | 0.1   |

## B. Sediments. Genus level taxa.

| Phylum           | Class                | Order                               | Family                              | Genus                       | R1sed | R2sed | R3sed | R4sed | R6sed | R7sed | R8sed |
|------------------|----------------------|-------------------------------------|-------------------------------------|-----------------------------|-------|-------|-------|-------|-------|-------|-------|
| Acetothermia     | Acetothermia         | Acetothermia                        | Acetothermia                        | Acetothermia                | 0.0   | 0.0   | 0.0   | 0.0   | 0.0   | 0.3   | 0.2   |
| Actinobacteriota | Actinobacteriota     | Actinomarinales                     | Actinomarinales                     | Actinomarinales             | 1.6   | 0.0   | 0.7   | 1.1   | 0.2   | 1.5   | 0.4   |
| Actinobacteriota | Actinobacteriota     | Corynebacteriales                   | Corynebacteriales                   | Corynebacteriales           | 0.2   | 0.3   | 0.1   | 0.1   | 0.0   | 0.0   | 0.0   |
| Actinobacteriota | Actinobacteriota     | Micrococcales                       | Micrococcales                       | Micrococcales               | 0.0   | 0.0   | 0.0   | 0.0   | 0.0   | 0.0   | 0.0   |
| Actinobacteriota | Actinobacteriota     | Micrococcales                       | Micrococcales                       | Micrococcales               | 0.1   | 0.7   | 0.1   | 0.1   | 0.0   | 0.4   | 0.1   |
| Actinobacteriota | Actinobacteriota     | Micrococcales                       | Micrococcales                       | Micrococcales               | 1.9   | 0.8   | 0.8   | 0.4   | 0.2   | 0.4   | 0.3   |
| Bacteroidota     | Bacteroidota         | Bacteroidales                       | Bacteroidales                       | Bacteroidales               | 0.5   | 0.3   | 1.5   | 0.3   | 0.2   | 3.1   | 2.5   |
| Bacteroidota     | Bacteroidota         | Bacteroidales                       | Bacteroidales                       | Bacteroidales               | 0.5   | 0.2   | 0.1   | 0.8   | 5.9   | 0.0   | 0.0   |
| Bacteroidota     | Bacteroidota         | Bacteroidales                       | Bacteroidales                       | Bacteroidales               | 0.0   | 0.2   | 0.5   | 0.2   | 1.9   | 0.4   | 0.1   |
| Bacteroidota     | Bacteroidota         | Bacteroidales                       | Bacteroidales                       | Bacteroidales               | 0.3   | 1.2   | 1.5   | 0.3   | 0.4   | 0.7   | 3.3   |
| Bacteroidota     | Bacteroidota         | Sphingobacteriales                  | Sphingobacteriales                  | Sphingobacteriales          | 0.1   | 0.6   | 2.5   | 0.5   | 0.2   | 3.9   | 1.3   |
| Campylobacterota | Campylobacterota     | Campylobacterales                   | Campylobacterales                   | Campylobacterales           | 0.9   | 0.7   | 0.2   | 0.3   | 0.8   | 0.4   | 0.2   |
| Campylobacterota | Campylobacterota     | Campylobacterales                   | Campylobacterales                   | Campylobacterales           | 2.1   | 0.5   | 0.4   | 0.3   | 0.9   | 0.0   | 0.0   |
| Campylobacterota | Campylobacterota     | Campylobacterales                   | Campylobacterales                   | Campylobacterales           | 1.8   | 1.5   | 0.5   | 1.3   | 2.6   | 0.5   | 0.4   |
| Campylobacterota | Campylobacterota     | Campylobacterales                   | Campylobacterales                   | Campylobacterales           | 5.7   | 0.3   | 2.3   | 0.1   | 2.0   | 1.2   | 1.2   |
| Campylobacterota | Campylobacterota     | Campylobacterales                   | Campylobacterales                   | Campylobacterales           | 2.3   | 0.0   | 2.2   | 0.6   | 1.1   | 2.5   | 0.2   |
| Chloroflexi      | Anaerolineae         | Anaerolineae                        | Anaerolineae                        | Anaerolineae                | 0.5   | 0.6   | 0.2   | 3.4   | 0.0   | 0.1   | 1.9   |
| Chloroflexi      | Anaerolineae         | Anaerolineae                        | Anaerolineae                        | Anaerolineae                | 0.0   | 0.1   | 0.1   | 0.1   | 0.7   | 0.5   | 0.1   |
| Chloroflexi      | Anaerolineae         | Anaerolineae                        | Anaerolineae                        | Anaerolineae                | 0.2   | 0.2   | 0.4   | 0.0   | 0.0   | 0.3   | 0.4   |
| Chloroflexi      | Thermomicrobiales    | Thermomicrobiales                   | Thermomicrobiales                   | Thermomicrobiales           | 0.0   | 0.7   | 0.0   | 0.1   | 0.0   | 0.0   | 0.0   |
| Cyanobacteria    | Cyanobacteria        | Chloroplast                         | Chloroplast                         | Chloroplast                 | 1.3   | 1.1   | 1.3   | 7.5   | 21.1  | 1.2   | 6.4   |
| Deferribacterota | Deferribacterota     | Deferribacterales                   | Deferribacterales                   | Deferribacterales           | 7.6   | 0.2   | 0.0   | 0.0   | 0.0   | 0.0   | 0.0   |
| Desulfobacterota | Desulfobacterota     | Desulfobacteriales                  | Desulfobacteriales                  | Desulfobacteriales          | 3.6   | 7.8   | 3.9   | 17.1  | 0.9   | 1.1   | 0.8   |
| Desulfobacterota | Desulfobacterota     | Desulfobacteriales                  | Desulfobacteriales                  | Desulfobacteriales          | 0.1   | 0.3   | 0.9   | 0.4   | 2.8   | 0.0   | 3.9   |
| Desulfobacterota | Desulfobacterota     | Desulfobacteriales                  | Desulfobacteriales                  | Desulfobacteriales          | 0.0   | 0.2   | 0.0   | 0.0   | 0.0   | 0.0   | 0.0   |
| Desulfobacterota | Desulfobacterota     | Desulfobacteriales                  | Desulfobacteriales                  | Desulfobacteriales          | 0.0   | 0.0   | 0.3   | 0.0   | 0.1   | 0.7   | 0.1   |
| Desulfobacterota | Desulfobacterota     | Desulfobacteriales                  | Desulfobacteriales                  | Desulfobacteriales          | 1.1   | 0.6   | 0.3   | 0.0   | 0.0   | 0.0   | 0.4   |
| Desulfobacterota | Desulfobacterota     | Desulfobacteriales                  | Desulfobacteriales                  | Desulfobacteriales          | 0.0   | 0.4   | 0.0   | 0.0   | 3.4   | 0.0   | 0.0   |
| Desulfobacterota | Desulfobacterota     | Desulfobacteriales                  | Desulfobacteriales                  | Desulfobacteriales          | 0.2   | 0.2   | 0.0   | 0.0   | 0.0   | 0.0   | 0.0   |
| Desulfobacterota | Desulfobacterota     | Desulfobacteriales                  | Desulfobacteriales                  | Desulfobacteriales          | 0.2   | 0.9   | 13.1  | 0.2   | 0.0   | 2.2   | 0.0   |
| Desulfobacterota | Desulfobacterota     | Desulfobacteriales                  | Desulfobacteriales                  | Desulfobacteriales          | 0.8   | 0.0   | 1.6   | 0.1   | 0.2   | 2.6   | 0.1   |
| Desulfobacterota | Desulfobacterota     | Desulfobacteriales                  | Desulfobacteriales                  | Desulfobacteriales          | 0.2   | 1.7   | 1.9   | 0.4   | 4.1   | 1.3   | 0.0   |
| Desulfobacterota | Desulfobacterota     | Desulfobacteriales                  | Desulfobacteriales                  | Desulfobacteriales          | 0.1   | 0.1   | 0.3   | 0.1   | 0.5   | 1.3   | 0.1   |
| Desulfobacterota | Desulfobacterota     | Desulfobacteriales                  | Desulfobacteriales                  | Desulfobacteriales          | 0.3   | 0.6   | 2.3   | 1.3   | 0.1   | 2.7   | 0.0   |
| Desulfobacterota | Desulfobacterota     | Desulfobacteriales                  | Desulfobacteriales                  | Desulfobacteriales          | 1.0   | 0.2   | 0.5   | 0.6   | 0.2   | 0.4   | 0.2   |
| Desulfobacterota | Desulfobacterota     | Desulfobacteriales                  | Desulfobacteriales                  | Desulfobacteriales          | 0.8   | 1.2   | 0.2   | 0.8   | 0.6   | 0.4   | 0.4   |
| Desulfobacterota | Desulfobacterota     | Desulfobacteriales                  | Desulfobacteriales                  | Desulfobacteriales          | 3.4   | 0.0   | 2.4   | 0.2   | 0.8   | 2.2   | 0.6   |
| Desulfobacterota | Desulfobacterota     | Desulfobacteriales                  | Desulfobacteriales                  | Desulfobacteriales          | 0.3   | 1.3   | 0.5   | 0.1   | 0.5   | 0.5   | 0.3   |
| Desulfobacterota | Desulfobacterota     | Desulfobacteriales                  | Desulfobacteriales                  | Desulfobacteriales          | 1.0   | 3.6   | 2.5   | 1.1   | 0.6   | 1.9   | 0.5   |
| Desulfobacterota | Desulfobacterota     | Desulfobacteriales                  | Desulfobacteriales                  | Desulfobacteriales          | 0.8   | 2.7   | 0.6   | 0.6   | 0.3   | 0.3   | 0.4   |
| Desulfobacterota | Desulfobacterota     | Desulfobacteriales                  | Desulfobacteriales                  | Desulfobacteriales          | 9.0   | 22.0  | 11.9  | 9.2   | 5.2   | 18.4  | 20.5  |
| Desulfobacterota | Desulfobacterota     | Desulfobacteriales                  | Desulfobacteriales                  | Desulfobacteriales          | 0.2   | 0.0   | 0.0   | 0.0   | 0.1   | 0.0   | 0.0   |
| Desulfobacterota | Desulfobacterota     | Desulfobacteriales                  | Desulfobacteriales                  | Desulfobacteriales          | 1.8   | 0.0   | 0.9   | 0.0   | 0.2   | 0.9   | 0.1   |
| Desulfobacterota | Desulfobacterota     | Desulfobacteriales                  | Desulfobacteriales                  | Desulfobacteriales          | 4.3   | 2.6   | 2.1   | 0.6   | 1.3   | 2.5   | 0.3   |
| Elusimicrobiota  | Elusimicrobiota      | Lineage IV                          | Lineage IV                          | Lineage IV                  | 0.0   | 0.1   | 0.0   | 0.0   | 0.0   | 1.6   | 0.0   |
| Firmicutes       | Bacilli              | Acholeplasmatales                   | Acholeplasmatales                   | Acholeplasma                | 0.2   | 0.2   | 0.3   | 0.2   | 1.9   | 0.2   | 0.0   |
| Firmicutes       | Bacilli              | Bacillales                          | Bacillales                          | Bacillales                  | 1.9   | 3.3   | 1.0   | 1.9   | 1.6   | 0.9   | 1.3   |
| Firmicutes       | Bacilli              | Bacillales                          | Bacillales                          | Bacillus                    | 1.3   | 1.3   | 0.4   | 1.0   | 0.5   | 0.6   | 0.6   |
| Firmicutes       | Bacilli              | Caldalkalibacillales                | Caldalkalibacillales                | Caldalkalibacillus          | 2.5   | 1.6   | 1.3   | 1.5   | 0.5   | 0.8   | 0.2   |
| Firmicutes       | Bacilli              | Erysipelotrichales                  | Erysipelotrichales                  | Erysipelotrichus            | 0.2   | 0.0   | 0.0   | 0.0   | 0.0   | 0.0   | 0.0   |
| Firmicutes       | Bacilli              | Izomoplasmatales                    | Izomoplasmatales                    | Izomoplasmataceae           | 0.5   | 0.3   | 0.3   | 0.3   | 9.3   | 0.4   | 2.6   |
| Firmicutes       | Bacilli              | Izomoplasmatales                    | Izomoplasmatales                    | Izomoplasmataceae           | 1.4   | 0.7   | 1.3   | 0.9   | 3.8   | 0.8   | 3.9   |
| Firmicutes       | Clostridia           | Clostridia vadinBB60 group          | Clostridia vadinBB60 group          | Clostridia vadinBB60 group  | 0.0   | 0.0   | 0.1   | 0.0   | 0.0   | 0.3   | 0.2   |
| Firmicutes       | Clostridia           | Clostridiales                       | Clostridiales                       | Clostridiales               | 1.0   | 2.6   | 0.5   | 0.5   | 0.2   | 0.4   | 0.4   |
| Firmicutes       | Clostridia           | Eubacteriales                       | Eubacteriales                       | Garciella                   | 2.1   | 5.7   | 1.0   | 0.6   | 1.3   | 1.3   | 0.7   |
| Firmicutes       | Clostridia           | Oscillospirales                     | Oscillospirales                     | Ercella                     | 0.1   | 0.0   | 0.0   | 0.0   | 0.0   | 0.0   | 0.0   |
| Firmicutes       | Clostridia           | Peptostreptococcales-Tissierellales | Peptostreptococcales-Tissierellales | Dethiosulfatibacter         | 0.4   | 0.1   | 0.0   | 0.1   | 0.0   | 0.0   | 0.0   |
| Firmicutes       | Clostridia           | Peptostreptococcales-Tissierellales | Peptostreptococcales-Tissierellales | JTB215                      | 0.2   | 0.0   | 0.0   | 0.0   | 0.5   | 0.0   | 0.0   |
| Firmicutes       | Clostridia           | Thermocolales                       | Thermocolales                       | Thermocola                  | 0.1   | 1.1   | 0.1   | 0.0   | 0.2   | 0.1   | 0.4   |
| Firmicutes       | Desulfotomaculia     | Desulfotomaculiales                 | Desulfotomaculiales                 | Desulfotomaculiales         | 0.3   | 1.3   | 0.3   | 0.1   | 0.1   | 0.3   | 0.0   |
| Firmicutes       | Firmicutes           | Firmicutes                          | Firmicutes                          | Firmicutes                  | 0.1   | 0.3   | 0.0   | 0.0   | 0.2   | 0.0   | 0.0   |
| Firmicutes       | Incertae Sedis       | Thermolithobacteriales              | Thermolithobacteriales              | Thermolithobacter           | 0.0   | 0.7   | 0.0   | 0.1   | 0.0   | 0.1   | 0.0   |
| Firmicutes       | Moorella             | Desulfobacteriales                  | Desulfobacteriales                  | Desulfobacter               | 0.3   | 1.2   | 0.3   | 0.2   | 1.5   | 0.3   | 0.1   |
| Firmicutes       | Thermacetogenia      | Thermacetogeniales                  | Thermacetogeniales                  | Thermacetogeniaceae         | 0.1   | 0.6   | 0.0   | 0.2   | 0.0   | 0.2   | 0.1   |
| Patesibacteria   | Gracilibacteria      | Absconditabacteriales (SR1)         | Absconditabacteriales (SR1)         | Absconditabacteriales (SR1) | 0.0   | 0.1   | 0.0   | 0.0   | 0.0   | 1.7   | 0.0   |
| Proteobacteria   | Alphaproteobacteria  | Caulobacteriales                    | Hyphomonadaceae                     | Hyphomonadaceae             | 0.0   | 0.1   | 0.0   | 2.1   | 0.0   | 0.0   | 0.0   |
| Proteobacteria   | Alphaproteobacteria  | Caulobacteriales                    | Hyphomonadaceae                     | Hyphomonas                  | 0.0   | 0.1   | 0.4   | 0.3   | 0.5   | 0.3   | 0.1   |
| Proteobacteria   | Alphaproteobacteria  | Parvibaculales                      | Parvibaculaceae                     | Parvibaculaceae             | 0.0   | 0.2   | 0.2   | 1.3   | 0.0   | 0.0   | 0.2   |
| Proteobacteria   | Alphaproteobacteria  | Parvibaculales                      | Parvibaculaceae                     | Parvibaculum                | 0.1   | 0.7   | 0.1   | 0.1   | 0.0   | 0.0   | 0.0   |
| Proteobacteria   | Alphaproteobacteria  | Rhizobiales                         | Rhizobiaceae                        | Cohesibacter                | 0.1   | 0.2   | 0.2   | 1.1   | 0.2   | 0.0   | 0.1   |
| Proteobacteria   | Alphaproteobacteria  | Rhodobacteriales                    | Rhodobacteraceae                    | Paracoccus                  | 0.6   | 2.8   | 0.6   | 0.6   | 0.3   | 0.0   | 0.4   |
| Proteobacteria   | Alphaproteobacteria  | Rhodobacteriales                    | Rhodobacteraceae                    | Rhodobacteraceae            | 0.6   | 2.5   | 3.0   | 6.6   | 1.7   | 2.4   | 3.3   |
| Proteobacteria   | Alphaproteobacteria  | Rhodobacteriales                    | Rhodobacteraceae                    | Ruegeria                    | 0.0   | 0.0   | 0.0   | 0.0   | 0.0   | 0.2   | 0.0   |
| Proteobacteria   | Alphaproteobacteria  | Rhodospirillales                    | AEGEAN-169 marine group             | AEGEAN-169 marine group     | 0.0   | 0.4   | 0.0   | 0.0   | 0.1   | 0.0   | 0.1   |
| Proteobacteria   | Alphaproteobacteria  | Rhodospirillales                    | Magnetospiraceae                    | Magnetovibrio               | 1.1   | 4.6   | 2.4   | 13.4  | 0.4   | 2.5   | 19.0  |
| Proteobacteria   | Alphaproteobacteria  | Rhodospirillales                    | Terasakiellaceae                    | Terasakiella                | 0.0   | 0.1   | 0.0   | 0.0   | 0.5   | 0.0   | 0.0   |
| Proteobacteria   | Alphaproteobacteria  | Rhodospirillales                    | Thalassospiraceae                   | Thalassospira               | 0.5   | 0.1   | 0.0   | 0.0   | 0.1   | 0.0   | 0.1   |
| Proteobacteria   | Alphaproteobacteria  | Sphingomonadales                    | Sphingomonadaceae                   | Erythrobacter               | 0.0   | 0.5   | 0.2   | 0.1   | 0.1   | 1.3   | 0.7   |
| Proteobacteria   | Alphaproteobacteria  | Thalassobaculales                   | Thalassobaculaceae                  | Thalassobaculaceae          | 0.0   | 0.0   | 0.1   | 2.0   | 0.0   | 0.6   | 0.4   |
| Proteobacteria   | Gammaaproteobacteria | CH2b56                              | CH2b56                              | CH2b56                      | 0.0   | 0.0   | 0.4   | 0.0   | 0.0   | 0.1   | 1.5   |
| Proteobacteria   | Gammaaproteobacteria | Chromatiales                        | Sedimenticolaceae                   | Candidatus Thiodiazotropha  | 0.0   | 0.2   | 0.0   | 0.2   | 1.7   | 0.5   | 0.1   |
| Proteobacteria   | Gammaaproteobacteria | Ectothiorhodospirales               | Thiohalophilus                      | Thiohalophilus              | 1.0   | 0.4   | 0.6   | 5.2   | 0.9   | 0.5   | 0.2   |
| Proteobacteria   | Gammaaproteobacteria | Enterobacteriales                   | Pseudalteromonadaceae               | Pseudalteromonas            | 1.9   | 0.0   | 0.0   | 0.0   | 0.1   | 0.0   | 0.0   |
| Proteobacteria   | Gammaaproteobacteria | Enterobacteriales                   | Shewanellaceae                      | Shewanella                  | 0.5   | 0.2   | 0.0   | 0.0   | 0.0   | 0.0   | 0.0   |
| Proteobacteria   | Gammaaproteobacteria | Enterobacteriales                   | Vibrionaceae                        | Vibrio                      | 0.3   | 0.2   | 0.0   | 0.1   | 0.2   | 0.2   | 0.0   |
| Proteobacteria   | Gammaaproteobacteria | Gammaaproteobacteria Incertae Sedis | Unknown Family                      | Unknown Family              | 0.5   | 1.1   | 3.5   | 3.8   | 1.5   | 10.3  | 10.9  |
| Proteobacteria   | Gammaaproteobacteria | Immundisolibacteriales              | Immundisolibacteraceae              | Immundisolibacter           | 0.0   | 0.3   | 0.0   | 0.0   | 0.0   | 0.0   | 0.0   |
| Proteobacteria   | Gammaaproteobacteria | Pseudomonadales                     | Halomonadaceae                      | Halomonas                   | 0.5   | 0.4   | 0.2   | 0.2   | 0.0   | 0.3   | 0.1   |
| Proteobacteria   | Gammaaproteobacteria | Pseudomonadales                     | Marinobacteraceae                   | Marinobacter                | 3.2   | 1.1   | 1.5   | 2.6   | 1.1   | 0.4   | 0.3   |
| Proteobacteria   | Gammaaproteobacteria | Pseudomonadales                     | Moraxellaceae                       | Acinetobacter               | 0.1   | 0.3   | 1.8   | 0.0   | 0.0   | 0.0   | 0.2   |
| Proteobacteria   | Gammaaproteobacteria | Pseudomonadales                     | Nitricolaceae                       | Amphritea                   | 0.2   | 0.3   | 0.0   | 0.6   | 0.4   | 0.0   | 0.1   |
| Proteobacteria   | Gammaaproteobacteria | Pseudomonadales                     | Nitricolaceae                       | Marinobacterium             | 0.8   | 0.0   | 0.0   | 0.0   | 0.2   | 0.0   | 0.0   |
| Proteobacteria   | Gammaaproteobacteria | Pseudomonadales                     | Nitricolaceae                       | Neptunomonas                | 0.0   | 0.0   | 0.0   | 0.0   | 0.2   | 0.0   | 0.0   |
| Proteobacteria   | Gammaaproteobacteria | Pseudomonadales                     | Nitricolaceae                       | Nitricola                   | 0.6   | 0.1   | 0.0   | 0.0   | 0.0   | 0.0   | 0.0   |
| Proteobacteria   | Gammaaproteobacteria | Steroidobacteriales                 | Woeseiaceae                         | Woeseia                     | 3.3   | 0.0   | 3.0   | 0.4   | 1.2   | 1.7   | 0.5   |
| Proteobacteria   | Gammaaproteobacteria | Thiotrichales                       | Thiotrichaceae                      | Thiotrichaceae              | 3.2   | 0.0   | 3.0   | 0.2   | 1.8   | 1.3   | 0.9   |
| Spirochaetota    | Spirochaetota        | Spirochaetales                      | Spirochaetales                      | Alkalispichoeta             | 0.5   | 0.1   | 1.4   | 0.0   | 0.0   | 1.0   | 0.0   |
| Spirochaetota    | Spirochaetota        | Spirochaetales                      | Spirochaetales                      | Sediminispirochaeta         | 0.6   | 0.2   | 0.0   | 0.0   | 0.5   | 1.2   | 0.1   |
| Spirochaetota    | Spirochaetota        | Spirochaetales                      | Spirochaetales                      | Spirochaeta 2               | 1.0   | 0.1   | 0.6   | 0.2   | 0.0   | 4.3   | 0.1   |
| Thermotogota     | Thermotogota         | Kosmotogales                        | Kosmotogaceae                       | Kosmotoga                   | 0.3   | 1.6   | 0.4   | 0.2   | 0.2   | 0.1   | 0.1   |

C. Coupons. Phylum level taxa, with the exception of Alphaproteobacteria and Gammaproteobacteria (Class level).

| Taxon                  | R1c2 | R1c3 | R2c1 | R2c2 | R2c3 | R3c1 | R3c2 | R3c3 | R4c1 | R4c2 | R4c3 | R5c1 | R5c2 | R5c3 | R6c1 | R6c2 | R6c3 | R7c1 | R7c2 | R7c3 | R8c1 | R8c2 | R8c3 |
|------------------------|------|------|------|------|------|------|------|------|------|------|------|------|------|------|------|------|------|------|------|------|------|------|------|
| Acetothermia           | 0.0  | 0.0  | 0.0  | 0.0  | 0.0  | 0.1  | 0.2  | 0.0  | 0.0  | 0.0  | 0.0  | 0.0  | 0.2  | 0.0  | 0.0  | 0.0  | 0.0  | 0.8  | 0.7  | 0.5  | 0.7  | 0.9  | 0.7  |
| Actinobacteriota       | 0.7  | 1.0  | 4.1  | 4.4  | 5.0  | 0.7  | 1.0  | 2.7  | 0.9  | 0.4  | 0.5  | 1.1  | 3.8  | 2.4  | 2.3  | 3.2  | 1.7  | 0.3  | 0.4  | 1.0  | 0.5  | 0.5  | 0.6  |
| Bacteroidota           | 0.5  | 0.5  | 5.3  | 1.5  | 3.4  | 1.3  | 1.2  | 2.1  | 0.3  | 0.4  | 0.4  | 0.8  | 3.8  | 1.4  | 2.2  | 2.9  | 2.2  | 1.8  | 1.0  | 0.8  | 0.9  | 1.2  | 1.6  |
| Campylobacterota       | 7.0  | 5.5  | 14.0 | 4.2  | 11.6 | 1.4  | 1.0  | 1.3  | 2.0  | 1.7  | 1.1  | 3.6  | 4.8  | 3.3  | 6.9  | 5.3  | 5.0  | 1.3  | 1.6  | 1.5  | 0.6  | 0.9  | 0.9  |
| Chloroflexi            | 0.1  | 0.3  | 0.1  | 1.0  | 0.2  | 0.9  | 0.4  | 0.6  | 7.4  | 6.5  | 7.1  | 0.4  | 0.8  | 0.5  | 1.9  | 0.9  | 1.3  | 1.0  | 0.4  | 0.5  | 0.6  | 0.5  | 0.4  |
| Cyanobacteria          | 0.9  | 1.0  | 0.8  | 4.2  | 0.7  | 0.4  | 0.7  | 0.7  | 0.5  | 0.1  | 0.8  | 0.3  | 2.6  | 0.8  | 4.5  | 0.0  | 2.0  | 0.1  | 0.4  | 0.2  | 0.1  | 0.4  | 0.3  |
| Deferribacterota       | 1.7  | 2.2  | 0.0  | 0.2  | 0.0  | 0.0  | 0.1  | 0.0  | 0.0  | 0.0  | 0.0  | 0.1  | 0.2  | 0.1  | 0.0  | 0.0  | 0.1  | 0.0  | 0.1  | 0.0  | 0.0  | 0.0  | 0.0  |
| Desulfobacterota       | 66.0 | 63.3 | 53.8 | 42.2 | 41.8 | 82.6 | 82.7 | 76.0 | 71.7 | 75.4 | 76.1 | 76.2 | 41.7 | 64.2 | 40.7 | 57.7 | 50.9 | 77.6 | 79.4 | 81.3 | 85.6 | 83.5 | 84.9 |
| Elusimicrobiota        | 0.0  | 0.0  | 0.0  | 0.1  | 0.0  | 0.1  | 0.0  | 0.0  | 0.0  | 0.0  | 0.0  | 0.0  | 0.2  | 0.1  | 0.1  | 0.0  | 0.1  | 2.4  | 2.5  | 1.3  | 0.0  | 0.0  | 0.0  |
| Firmicutes             | 12.3 | 14.8 | 5.8  | 24.2 | 8.2  | 6.2  | 6.7  | 8.6  | 4.9  | 3.7  | 3.1  | 8.7  | 20.0 | 14.1 | 21.5 | 16.0 | 23.3 | 4.5  | 4.7  | 4.0  | 5.0  | 5.9  | 4.3  |
| * Alpha Proteobacteria | 3.1  | 4.3  | 8.6  | 11.9 | 23.3 | 2.3  | 2.9  | 3.1  | 4.6  | 5.4  | 4.7  | 2.8  | 10.6 | 5.2  | 7.0  | 4.6  | 5.5  | 1.6  | 1.5  | 2.8  | 2.5  | 2.4  | 2.4  |
| * Gamma Proteobacteria | 5.8  | 4.8  | 6.8  | 3.2  | 4.2  | 3.0  | 1.8  | 2.8  | 6.9  | 5.6  | 4.8  | 4.8  | 5.0  | 5.6  | 9.1  | 7.0  | 4.9  | 5.2  | 4.9  | 4.0  | 2.3  | 2.2  | 2.8  |
| Spirochaetota          | 0.3  | 0.2  | 0.1  | 0.0  | 0.0  | 0.0  | 0.1  | 0.1  | 0.0  | 0.0  | 0.0  | 0.1  | 0.5  | 0.1  | 1.6  | 1.2  | 1.2  | 0.2  | 0.2  | 0.2  | 0.1  | 0.6  | 0.3  |
| Synergistota           | 0.2  | 0.1  | 0.1  | 0.3  | 0.0  | 0.0  | 0.1  | 0.4  | 0.0  | 0.0  | 0.1  | 0.0  | 0.9  | 0.3  | 0.1  | 0.1  | 0.0  | 0.1  | 0.0  | 0.0  | 0.0  | 0.0  | 0.1  |
| Thermotogota           | 0.3  | 0.6  | 0.2  | 0.9  | 0.4  | 0.5  | 0.4  | 0.7  | 0.1  | 0.2  | 0.3  | 0.6  | 1.9  | 0.9  | 0.4  | 0.4  | 0.5  | 0.1  | 0.4  | 0.3  | 0.2  | 0.1  | 0.2  |

## D. Coupons. Genus level.

| Phylum           | Class           | Order                      | Family                     | Genus                      | R1c2 | R1c3 | R2c1 | R2c2 | R3c1 | R3c2 | R3c3 | R4c1 | R4c2 | R4c3 | R5c1 | R5c2 | R5c3 | R6c1 | R6c2 | R6c3 | R7c1 | R7c2 | R7c3 | R8c1 | R8c2 | R8c3 |
|------------------|-----------------|----------------------------|----------------------------|----------------------------|------|------|------|------|------|------|------|------|------|------|------|------|------|------|------|------|------|------|------|------|------|------|
| Acetothermia     | Acetothermia    | Acetothermia               | Acetothermia               | Acetothermia               | 0.0  | 0.0  | 0.0  | 0.0  | 0.2  | 0.2  | 0.0  | 0.0  | 0.0  | 0.0  | 0.0  | 0.3  | 0.0  | 0.0  | 0.0  | 0.0  | 0.0  | 0.0  | 0.0  | 0.0  | 0.0  | 0.0  |
| Actinobacteria   | Actinobacteria  | Actinominales              | Actinominales              | Actinominales              | 0.1  | 0.1  | 0.0  | 0.0  | 0.2  | 0.2  | 0.3  | 0.0  | 0.1  | 0.1  | 0.0  | 0.2  | 0.0  | 0.4  | 0.0  | 0.2  | 0.0  | 0.0  | 0.0  | 0.0  | 0.1  | 0.1  |
| Actinobacteria   | Actinobacteria  | Corynebacteriales          | Dietziaceae                | Dietzia                    | 0.0  | 0.1  | 0.2  | 1.4  | 0.0  | 0.0  | 0.2  | 0.3  | 0.2  | 0.2  | 0.1  | 0.2  | 0.7  | 0.3  | 0.0  | 0.0  | 0.1  | 0.1  | 0.0  | 0.1  | 0.0  | 0.2  |
| Actinobacteria   | Actinobacteria  | Micrococcales              | Cellulomonadaceae          | Actinotalea                | 0.2  | 0.2  | 2.3  | 0.0  | 2.9  | 0.0  | 0.0  | 0.0  | 0.0  | 0.0  | 0.0  | 0.0  | 0.2  | 0.0  | 0.0  | 0.0  | 0.0  | 0.0  | 0.0  | 0.0  | 0.0  | 0.0  |
| Actinobacteria   | Actinobacteria  | Micrococcales              | Intrasporangiaceae         | Ornithinococcus            | 0.0  | 0.0  | 0.1  | 1.1  | 0.1  | 0.0  | 0.0  | 0.7  | 0.2  | 0.0  | 0.0  | 0.5  | 0.4  | 0.5  | 0.1  | 0.2  | 0.3  | 0.0  | 0.2  | 0.1  | 0.1  | 0.0  |
| Actinobacteria   | Actinobacteria  | Micrococcales              | Micrococaceae              | Nesterenkonia              | 0.4  | 0.6  | 1.6  | 1.3  | 1.9  | 0.5  | 0.7  | 0.8  | 0.3  | 0.1  | 0.4  | 0.4  | 0.6  | 0.7  | 1.3  | 3.2  | 1.0  | 0.2  | 0.1  | 0.6  | 0.3  | 0.2  |
| Bacteroidota     | Bacteroidia     | Bacteroidales              | Bacteroidetes BD2-2        | Bacteroidetes BD2-2        | 0.0  | 0.0  | 0.0  | 0.0  | 0.0  | 0.5  | 0.5  | 0.4  | 0.0  | 0.0  | 0.0  | 0.2  | 0.6  | 0.1  | 0.0  | 0.3  | 0.1  | 1.0  | 0.3  | 0.2  | 0.6  | 0.7  |
| Bacteroidota     | Bacteroidia     | Bacteroidales              | Prolixibacteraceae         | Dracombacterium            | 0.0  | 0.1  | 0.7  | 0.0  | 0.7  | 0.0  | 0.0  | 0.0  | 0.1  | 0.1  | 0.1  | 0.1  | 0.3  | 0.1  | 0.3  | 1.5  | 0.6  | 0.0  | 0.0  | 0.0  | 0.0  | 0.0  |
| Bacteroidota     | Bacteroidia     | Bacteroidales              | Prolixibacteraceae         | Prolixibacteraceae         | 0.1  | 0.1  | 0.0  | 0.0  | 0.0  | 0.2  | 0.2  | 0.2  | 0.0  | 0.0  | 0.0  | 0.1  | 0.1  | 0.1  | 0.8  | 0.7  | 1.0  | 0.4  | 0.2  | 0.1  | 0.0  | 0.2  |
| Bacteroidota     | Bacteroidia     | Flavobacteriales           | Flavobacteriaceae          | Lulibacter                 | 0.0  | 0.1  | 4.72 | 0.2  | 2.7  | 0.4  | 0.3  | 0.4  | 0.0  | 0.1  | 0.1  | 0.1  | 0.9  | 0.3  | 0.1  | 0.1  | 0.0  | 0.0  | 0.2  | 0.2  | 0.2  | 0.3  |
| Bacteroidota     | Bacteroidia     | Sphingobacteriales         | Lentimicrobiaceae          | Lentimicrobiaceae          | 0.2  | 0.0  | 0.0  | 0.7  | 0.1  | 0.2  | 0.2  | 0.6  | 0.0  | 0.0  | 0.0  | 0.1  | 0.7  | 0.3  | 0.1  | 0.1  | 0.1  | 0.5  | 0.2  | 0.2  | 0.1  | 0.1  |
| Campylobacterota | Campylobacteri  | Campylobacterales          | Arcoabacteraceae           | Arcoabacteraceae           | 1.5  | 1.8  | 4.4  | 0.0  | 4.4  | 0.1  | 0.0  | 0.2  | 0.4  | 0.4  | 0.3  | 0.3  | 1.1  | 0.6  | 1.7  | 1.1  | 1.1  | 0.5  | 0.6  | 0.3  | 0.3  | 0.2  |
| Campylobacterota | Campylobacteri  | Arcoabacterales            | Arcoabacteraceae           | Halarcobacter              | 2.4  | 1.5  | 3.0  | 0.6  | 4.4  | 0.4  | 0.4  | 0.1  | 0.3  | 0.2  | 0.1  | 0.9  | 1.6  | 0.6  | 1.4  | 0.3  | 1.3  | 0.1  | 0.2  | 0.2  | 0.0  | 0.1  |
| Campylobacterota | Campylobacteri  | Campylobacterales          | Arcoabacteraceae           | Poseidonibacter            | 2.8  | 3.0  | 6.6  | 2.9  | 3.4  | 0.8  | 0.6  | 0.8  | 1.2  | 1.0  | 0.7  | 2.3  | 1.8  | 1.9  | 3.1  | 4.1  | 2.3  | 0.6  | 0.7  | 1.1  | 0.3  | 0.5  |
| Campylobacterota | Campylobacteri  | Campylobacterales          | Sulfurimonadaceae          | Sulfurimonas               | 0.1  | 0.1  | 0.1  | 0.5  | 0.0  | 0.2  | 0.0  | 0.1  | 0.0  | 0.1  | 0.0  | 0.1  | 0.4  | 0.1  | 0.1  | 0.0  | 0.0  | 0.1  | 0.0  | 0.0  | 0.0  | 0.0  |
| Campylobacterota | Campylobacteri  | Campylobacterales          | Sulfurovaceae              | Sulfurovum                 | 0.5  | 0.4  | 0.3  | 0.3  | 0.1  | 0.1  | 0.0  | 0.1  | 0.1  | 0.2  | 0.0  | 0.1  | 0.3  | 0.2  | 1.1  | 0.5  | 0.1  | 0.1  | 0.1  | 0.1  | 0.1  | 0.1  |
| Chloroflexi      | Anaerolineae    | Anaerolineales             | Anaerolineaceae            | ADuRB_Bin120               | 0.1  | 0.1  | 0.0  | 0.8  | 0.1  | 0.4  | 0.2  | 0.2  | 7.4  | 6.5  | 7.2  | 0.5  | 0.4  | 0.4  | 0.1  | 0.0  | 0.1  | 0.1  | 0.2  | 0.5  | 0.2  | 0.2  |
| Chloroflexi      | Anaerolineae    | Anaerolineales             | Anaerolineaceae            | Ornatilinea                | 0.0  | 0.0  | 0.0  | 0.3  | 0.0  | 0.3  | 0.3  | 0.0  | 0.0  | 0.0  | 0.0  | 0.0  | 0.1  | 0.1  | 1.7  | 0.9  | 1.2  | 0.2  | 0.2  | 0.0  | 0.2  | 0.1  |
| Chloroflexi      | Anaerolineae    | Anaerolineales             | Anaerolineaceae            | Pelotinea                  | 0.0  | 0.0  | 0.0  | 0.0  | 0.5  | 0.2  | 0.4  | 0.1  | 0.1  | 0.0  | 0.0  | 0.3  | 0.0  | 0.0  | 0.0  | 0.0  | 0.0  | 0.1  | 0.0  | 0.1  | 0.1  | 0.1  |
| Chloroflexi      | Chloroflexia    | Thermomicrobiales          | IG30-KF-CM45               | IG30-KF-CM45               | 0.1  | 0.1  | 0.0  | 0.4  | 0.0  | 0.0  | 0.0  | 0.2  | 0.1  | 0.0  | 0.0  | 0.5  | 0.2  | 0.1  | 0.0  | 0.3  | 0.1  | 0.0  | 0.0  | 0.1  | 0.1  | 0.1  |
| Cyanobacteria    | Cyanobacteria   | Chloroplast                | Chloroplast                | Chloroplast                | 0.9  | 1.1  | 0.8  | 4.3  | 0.8  | 0.4  | 0.7  | 0.7  | 0.6  | 0.1  | 0.9  | 0.3  | 2.9  | 0.9  | 4.7  | 0.0  | 2.1  | 0.1  | 0.5  | 0.2  | 0.1  | 0.5  |
| Deferribacterota | Deferribacteres | Deferribacterales          | Deferribacteraceae         | Dentitrobo                 | 1.1  | 1.5  | 0.0  | 0.0  | 0.0  | 0.0  | 0.1  | 0.0  | 0.0  | 0.0  | 0.0  | 0.1  | 0.2  | 0.0  | 0.0  | 0.0  | 0.1  | 0.0  | 0.1  | 0.0  | 0.0  | 0.0  |
| Desulfobacterota | Desulfobacteria | Desulfobacterales          | Desulfobacteraceae         | Desulfobacter              | 24.1 | 19.4 | 1.4  | 6.0  | 1.1  | 1.6  | 1.7  | 1.8  | 25.2 | 26.8 | 26.2 | 16.2 | 6.9  | 10.5 | 2.9  | 1.6  | 1.8  | 0.7  | 2.2  | 3.1  | 2.3  | 1.7  |
| Desulfobacterota | Desulfobacteria | Desulfobacterales          | Desulfobacteraceae         | Desulfobacteraceae         | 0.5  | 0.1  | 1.6  | 0.0  | 1.0  | 0.3  | 0.2  | 0.2  | 0.1  | 0.0  | 0.2  | 0.0  | 0.1  | 0.0  | 2.9  | 1.2  | 2.4  | 0.0  | 0.0  | 0.0  | 0.0  | 0.2  |
| Desulfobacterota | Desulfobacteria | Desulfobacterales          | Desulfobacteraceae         | Desulfocoenoxum            | 0.0  | 0.0  | 0.5  | 0.0  | 0.1  | 0.0  | 0.1  | 0.0  | 0.0  | 0.0  | 0.0  | 0.0  | 0.1  | 0.0  | 0.2  | 0.0  | 0.0  | 0.0  | 0.0  | 0.0  | 0.0  | 0.0  |
| Desulfobacterota | Desulfobacteria | Desulfobacterales          | Desulfobacteraceae         | Desulfotogira              | 0.0  | 0.0  | 0.0  | 0.0  | 0.3  | 0.3  | 0.2  | 0.2  | 0.0  | 0.0  | 0.0  | 0.1  | 0.9  | 0.2  | 0.0  | 0.0  | 0.0  | 0.2  | 0.1  | 0.2  | 0.1  | 0.0  |
| Desulfobacterota | Desulfobacteria | Desulfobacterales          | Desulfobacteraceae         | Desulfotogirum             | 1.1  | 1.0  | 0.0  | 0.0  | 0.2  | 0.0  | 0.2  | 0.2  | 0.1  | 0.1  | 0.7  | 0.3  | 0.2  | 0.0  | 0.0  | 0.0  | 0.0  | 0.0  | 0.0  | 0.7  | 0.4  | 0.3  |
| Desulfobacterota | Desulfobacteria | Desulfobacterales          | Desulfotolunaceae          | Desulfotoluna              | 0.0  | 0.1  | 0.0  | 0.2  | 0.0  | 0.0  | 0.0  | 0.0  | 0.0  | 0.0  | 0.0  | 0.0  | 0.3  | 0.1  | 2.5  | 1.5  | 0.9  | 0.0  | 0.0  | 0.0  | 0.0  | 0.0  |
| Desulfobacterota | Desulfobacteria | Desulfobacterales          | Desulfosarcinaceae         | Desulfosarcina             | 0.7  | 0.8  | 0.0  | 0.6  | 0.0  | 0.0  | 0.0  | 0.0  | 0.0  | 0.0  | 0.0  | 0.5  | 0.2  | 0.6  | 0.0  | 0.0  | 0.3  | 0.0  | 0.0  | 0.0  | 0.0  | 0.0  |
| Desulfobacterota | Desulfobacteria | Desulfobacterales          | Desulfosarcinaceae         | Desulfosarcinobacter       | 0.3  | 0.2  | 0.2  | 0.7  | 0.3  | 2.6  | 4.0  | 2.1  | 0.0  | 0.2  | 0.2  | 1.1  | 0.6  | 0.7  | 0.0  | 0.0  | 0.3  | 0.5  | 0.8  | 0.1  | 0.1  | 0.0  |
| Desulfobacterota | Desulfobacteria | Desulfobacterales          | Desulfosarcinaceae         | Desulfosarcina             | 0.0  | 0.0  | 0.0  | 0.0  | 0.1  | 0.0  | 0.1  | 0.1  | 0.1  | 0.1  | 0.2  | 0.0  | 0.3  | 0.2  | 1.7  | 1.6  | 0.0  | 0.0  | 0.0  | 0.2  | 0.1  | 0.1  |
| Desulfobacterota | Desulfobacteria | Desulfobacterales          | Desulfosarcinaceae         | Desulfosarcinaceae         | 0.0  | 0.5  | 13.5 | 2.2  | 13.6 | 0.2  | 0.3  | 0.3  | 0.1  | 0.5  | 0.3  | 0.5  | 0.9  | 0.6  | 4.4  | 0.7  | 2.2  | 0.0  | 0.1  | 0.1  | 0.4  | 0.4  |
| Desulfobacterota | Desulfobacteria | Desulfobacterales          | Desulfosarcinaceae         | Sva0081 sediment group     | 0.0  | 0.0  | 0.0  | 0.0  | 0.0  | 0.0  | 0.0  | 0.0  | 0.0  | 0.0  | 0.0  | 0.0  | 0.1  | 0.1  | 0.0  | 3.9  | 2.0  | 0.0  | 0.0  | 0.0  | 0.0  | 0.0  |
| Desulfobacterota | Desulfobacteria | Desulfobacterales          | Desulfosarcinaceae         | Desulfosarcinaceae         | 1.3  | 1.4  | 0.0  | 0.0  | 0.2  | 0.0  | 0.2  | 5.0  | 6.1  | 6.3  | 0.1  | 0.7  | 0.7  | 0.4  | 0.0  | 0.0  | 0.0  | 2.2  | 1.2  | 1.9  | 0.1  | 0.4  |
| Desulfobacterota | Desulfobacteria | Desulfobacterales          | Desulfosarcinaceae         | Desulfosarcinaceae         | 18.9 | 18.5 | 0.1  | 1.1  | 0.0  | 2.9  | 2.2  | 2.7  | 3.7  | 4.7  | 3.7  | 3.3  | 1.3  | 1.7  | 0.4  | 0.3  | 2.4  | 1.3  | 2.3  | 1.0  | 0.4  | 1.6  |
| Desulfobacterota | Desulfobacteria | Desulfobacterales          | Desulfosarcinaceae         | Desulfosarcinaceae         | 1.1  | 1.0  | 0.8  | 0.0  | 0.6  | 0.7  | 0.5  | 0.5  | 4.3  | 4.4  | 2.5  | 11.5 | 1.6  | 6.9  | 1.4  | 3.3  | 1.4  | 1.3  | 1.1  | 0.7  | 1.3  | 2.1  |
| Desulfobacterota | Desulfobacteria | Desulfobacterales          | Desulfosarcinaceae         | MSBL7                      | 0.0  | 0.1  | 0.0  | 0.0  | 0.0  | 0.0  | 0.1  | 0.0  | 0.0  | 0.0  | 0.0  | 0.0  | 0.3  | 0.1  | 0.0  | 0.0  | 0.0  | 0.0  | 0.0  | 0.0  | 0.0  | 0.0  |
| Desulfobacterota | Desulfobacteria | Desulfobacteriales         | Desulfosarcinaceae         | Desulfosarcinobacter       | 0.7  | 0.7  | 0.4  | 0.0  | 0.2  | 0.4  | 0.2  | 0.7  | 0.2  | 0.2  | 0.8  | 1.2  | 1.3  | 0.2  | 0.0  | 0.4  | 0.2  | 0.3  | 0.4  | 0.1  | 0.3  | 0.1  |
| Desulfobacterota | Desulfobacteria | Desulfobacteriales         | Desulfosarcinaceae         | Desulfosarcinobacter       | 1.3  | 0.6  | 1.0  | 3.8  | 0.7  | 58.9 | 54.6 | 52.0 | 0.5  | 0.6  | 1.3  | 5.6  | 2.8  | 5.1  | 0.5  | 0.4  | 1.1  | 2.1  | 4.0  | 2.6  | 1.1  | 0.6  |
| Desulfobacterota | Desulfobacteria | Desulfobacteriales         | Desulfosarcinaceae         | Desulfosarcinobacter       | 0.4  | 0.9  | 0.3  | 2.1  | 0.3  | 0.5  | 0.6  | 0.4  | 0.3  | 0.4  | 0.7  | 2.6  | 1.2  | 0.4  | 0.3  | 0.9  | 0.2  | 0.6  | 0.7  | 0.3  | 0.2  | 0.3  |
| Desulfobacterota | Desulfobacteria | Desulfobacteriales         | Desulfosarcinaceae         | Desulfosarcinobacter       | 13.4 | 16.6 | 30.1 | 23.5 | 23.9 | 14.4 | 18.4 | 16.2 | 32.7 | 32.5 | 35.9 | 33.6 | 19.8 | 33.3 | 20.1 | 44.3 | 31.1 | 69.0 | 69.7 | 69.4 | 78.2 | 77.3 |
| Desulfobacterota | Desulfobacteria | Desulfobacteriales         | Desulfosarcinaceae         | Desulfosarcinobacter       | 0.2  | 0.8  | 1.3  | 0.0  | 0.2  | 0.0  | 0.0  | 0.0  | 0.0  | 0.0  | 0.0  | 0.0  | 0.0  | 0.0  | 0.0  | 0.0  | 0.0  | 0.0  | 0.0  | 0.0  | 0.0  | 0.0  |
| Desulfobacterota | Desulfobacteria | Desulfobacteriales         | Desulfosarcinaceae         | Sva1033                    | 0.1  | 0.0  | 0.0  | 0.0  | 0.0  | 0.0  | 0.1  | 0.0  | 0.0  | 0.0  | 0.0  | 0.0  | 0.2  | 0.0  | 0.0  | 0.0  | 0.0  | 0.0  | 0.0  | 0.0  | 0.0  | 0.0  |
| Desulfobacterota | Desulfobacteria | Desulfobacteriales         | Desulfosarcinaceae         | Syntrophotalea             | 3.6  | 3.0  | 4.0  | 2.8  | 1.4  | 0.0  | 0.3  | 0.5  | 0.9  | 0.5  | 0.6  | 1.3  | 3.0  | 1.2  | 5.3  | 3.0  | 5.1  | 0.5  | 0.5  | 1.1  | 0.0  | 0.6  |
| Desulfobacterota | Desulfobacteria | Desulfobacteriales         | Desulfosarcinaceae         | Lineage IV                 | 0.0  | 0.0  | 0.0  | 0.1  | 0.0  | 0.1  | 0.0  | 0.0  | 0.0  | 0.0  | 0.0  | 0.0  | 0.2  | 0.2  | 0.1  | 0.1  | 2.4  | 2.6  | 1.3  | 1.0  | 0.0  | 0.0  |
| Firmicutes       | Bacilli         | Acholeplasmatales          | Acholeplasmataceae         | Acholeplasma               | 0.1  | 0.1  | 0.0  | 0.2  | 0.0  | 0.2  | 0.0  | 0.1  | 0.2  | 0.2  | 0.1  | 0.0  | 0.1  | 0.1  | 0.4  | 0.2  | 0.2  | 0.1  | 0.0  | 0.0  | 0.0  | 0.0  |
| Firmicutes       | Bacilli         | Bacillales                 | Bacillaceae                | Bacillaceae                | 0.7  | 0.7  | 0.4  | 4.7  | 1.2  | 0.5  | 0.5  | 0.9  | 0.5  | 1.0  | 0.2  | 0.9  | 3.1  | 1.8  | 2.2  | 2.1  | 0.9  | 0.4  | 0.7  | 0.6  | 0.4  | 0.8  |
| Firmicutes       | Bacilli         | Bacillales                 | Bacillaceae                | Bacillus                   | 0.3  | 0.5  | 0.7  | 1.4  | 0.3  | 0.3  | 0.2  | 0.9  | 0.6  | 0.2  | 0.2  | 0.8  | 1.4  | 1.2  | 0.7  | 2.1  | 2.2  | 1.5  | 0.4  | 0.3  | 0.4  | 0.2  |
| Firmicutes       | Bacilli         | Caldalkalibacillales       | Caldalkalibacillaceae      | Caldalkalibacillus         | 0.7  | 1.0  | 2.3  | 2.2  | 3.0  | 0.5  | 0.4  | 1.0  | 0.7  | 0.6  | 0.9  | 0.7  | 1.4  | 1.2  | 2.4  | 5.3  | 2.8  | 0.2  | 0.5  | 0.1  | 0.4  | 0.5  |
| Firmicutes       | Bacilli         | Erysipelotrichales         | Erysipelotrichaceae        | Erysipelotrich             | 0.2  | 0.3  | 0.0  | 0.0  | 0.0  | 0.0  | 0.0  | 0.0  | 0.0  | 0.0  | 0.0  | 0.1  | 0.0  | 0.1  | 0.0  | 0.0  | 0.0  | 0.0  | 0.0  | 0.0  | 0.0  | 0.0  |
| Firmicutes       | Bacilli         | Izomoplasmales             | Izomoplasmataceae          | Izomoplasmataceae          | 0.1  | 0.4  | 0.0  | 0.2  | 0.2  | 0.1  | 0.3  | 0.3  | 0.2  | 0.2  | 0.3  | 0.5  | 0.4  | 7.5  | 0.3  | 0.3  | 0.7  | 0.1  | 0.7  | 0.9  | 0.6  |      |
| Firmicutes       | Bacilli         | Izomoplasmales             | Izomoplasmataceae          | Izomoplasma                | 3.0  | 3.2  | 0.0  | 0.0  | 0.0  | 1.9  | 2.3  | 1.6  | 0.4  | 0.2  | 0.2  | 1.8  | 1.3  | 1.7  | 0.6  | 0.4  | 0.3  | 0.4  | 0.2  | 0.4  | 0.7  | 0.5  |
| Firmicutes       | Clostridia      | Clostridia vadinBB60 group | Clostridia vadinBB60 group | Clostridia vadinBB60 group | 0.2  | 0.9  | 0.0  | 0.0  | 0.0  |      |      |      |      |      |      |      |      |      |      |      |      |      |      |      |      |      |
