# Supplementary material for: Microbial Communities in Model Seawater-Compensated Fuel Ballast Tanks: Biodegradation and Biocorrosion Stimulated by Marine Sediments
Source: MDPI journal article supplement (doi:10.3390/cmd5010001), 2024-01-03
Supplement: s1 [file s1]

Table S4. Microbial community composition of the water samples. Relative abundance (%) of taxa within 16S rRNA amplicon libraries for phase 1 (“ph1”) and phase 2 (“ph2”). R1, R2: petro-F76 fuel. R3, R4: FT-F76 fuel. R5, R6: mix of petro- and FT-F76 fuel. R7, R8: no fuel added.

A. Phylum level taxa, with the exception of Alphaproteobacteria and Gammaproteobacteria (Class level).

| Taxon                 | R1ph1 | R1ph2 | R2ph1 | R2ph2 | R3ph1 | R3ph2 | R4ph1 | R4ph2 | R5ph1 | R5ph2 | R6ph1 | R6ph2 | R7ph1 | R7ph2 | R8ph1 | R8ph2 |
|-----------------------|-------|-------|-------|-------|-------|-------|-------|-------|-------|-------|-------|-------|-------|-------|-------|-------|
| Acetothermia          | 0.1   | 0.0   | 0.1   | 0.0   | 0.0   | 0.1   | 0.1   | 0.0   | 0.0   | 0.0   | 0.0   | 0.0   | 1.1   | 0.4   | 0.0   | 0.3   |
| Actinobacteriota      | 0.1   | 0.3   | 0.1   | 0.0   | 0.3   | 0.0   | 0.4   | 0.1   | 0.0   | 0.0   | 0.0   | 0.1   | 0.0   | 0.1   | 0.0   | 0.2   |
| Actinobacteriota      | 4.5   | 0.8   | 2.4   | 1.3   | 0.3   | 0.5   | 1.8   | 0.6   | 1.9   | 0.4   | 0.4   | 0.4   | 0.9   | 0.5   | 0.7   | 0.3   |
| Bacteroidota          | 3.1   | 0.7   | 9.4   | 4.2   | 10.4  | 14.6  | 1.4   | 0.7   | 1.7   | 0.6   | 0.7   | 2.6   | 8.7   | 10.5  | 7.0   | 2.6   |
| Campylobacterota      | 2.6   | 5.6   | 28.4  | 3.5   | 1.0   | 0.9   | 1.3   | 0.7   | 4.0   | 0.8   | 29.9  | 2.4   | 0.6   | 1.0   | 0.7   | 0.5   |
| Chloroflexi           | 0.4   | 3.9   | 0.3   | 0.1   | 1.4   | 0.5   | 1.8   | 2.0   | 0.3   | 0.6   | 1.2   | 1.1   | 0.8   | 0.2   | 2.5   | 0.5   |
| Cyanobacteria         | 3.0   | 2.4   | 1.0   | 7.2   | 0.1   | 0.4   | 0.7   | 3.1   | 1.3   | 0.1   | 0.4   | 3.0   | 0.1   | 0.7   | 0.3   | 1.5   |
| Deferribacterota      | 0.0   | 0.9   | 0.1   | 0.0   | 0.0   | 0.1   | 0.0   | 0.0   | 0.1   | 0.0   | 0.0   | 0.0   | 0.0   | 0.0   | 0.0   | 0.0   |
| Desulfobacterota      | 34.1  | 30.7  | 27.0  | 52.7  | 56.8  | 71.4  | 22.9  | 44.5  | 60.8  | 42.1  | 39.8  | 40.2  | 20.0  | 61.3  | 14.2  | 47.4  |
| Elusimicrobiota       | 0.0   | 0.0   | 0.1   | 0.0   | 0.0   | 0.1   | 0.0   | 0.0   | 0.1   | 0.0   | 0.0   | 0.1   | 0.0   | 0.0   | 4.1   | 0.0   |
| Firmicutes            | 37.0  | 30.3  | 8.9   | 2.7   | 4.7   | 4.0   | 21.1  | 2.8   | 16.8  | 6.9   | 5.6   | 32.9  | 5.8   | 3.8   | 11.4  | 5.8   |
| *Alpha Proteobacteria | 7.9   | 7.3   | 12.3  | 23.6  | 21.3  | 3.1   | 38.3  | 31.9  | 7.4   | 5.1   | 7.6   | 6.9   | 57.2  | 6.8   | 57.7  | 31.3  |
| *Gamma Proteobacteria | 3.5   | 15.6  | 7.5   | 3.9   | 2.6   | 1.3   | 7.0   | 12.6  | 3.0   | 41.9  | 12.9  | 7.2   | 2.9   | 7.2   | 3.7   | 7.8   |
| Spirochaetota         | 0.0   | 0.2   | 0.1   | 0.0   | 0.2   | 1.6   | 0.0   | 0.0   | 0.1   | 0.2   | 0.4   | 1.1   | 0.7   | 0.4   | 0.4   | 0.3   |
| Synergistota          | 0.4   | 0.1   | 0.3   | 0.1   | 0.1   | 0.0   | 0.0   | 0.1   | 0.2   | 0.0   | 0.0   | 0.0   | 0.3   | 0.1   | 0.0   | 0.0   |
| Thermotogota          | 1.6   | 0.4   | 0.9   | 0.2   | 0.2   | 0.2   | 1.0   | 0.4   | 0.7   | 0.5   | 0.3   | 0.3   | 0.4   | 0.2   | 0.8   | 0.4   |

## B. Genus level taxa.

| Phylum           | Family                | Genus                  | R1ph1 | R1ph2 | R2ph1 | R2ph2 | R3ph1 | R3ph2 | R4ph1 | R4ph2 | R5ph1 | R5ph2 | R6ph1 | R6ph2 | R7ph1 | R7ph2 | R8ph1 | R8ph2 |
|------------------|-----------------------|------------------------|-------|-------|-------|-------|-------|-------|-------|-------|-------|-------|-------|-------|-------|-------|-------|-------|
| Acetothermia     | Acetothermiia         | Acetothermiia          | 0.1   | 0.0   | 0.1   | 0.0   | 0.0   | 0.1   | 0.1   | 0.0   | 0.0   | 0.0   | 0.0   | 0.0   | 1.1   | 0.5   | 0.0   | 0.3   |
| Actinobacteriota | Actinomarinales       | Actinomarinales        | 0.1   | 0.0   | 0.0   | 0.0   | 0.3   | 0.0   | 0.1   | 0.0   | 0.0   | 0.0   | 0.0   | 0.0   | 0.0   | 0.1   | 0.0   | 0.2   |
| Actinobacteriota | Dietziaceae           | Dietzia                | 0.7   | 0.0   | 0.2   | 0.1   | 0.0   | 0.1   | 0.2   | 0.1   | 0.3   | 0.1   | 0.1   | 0.0   | 0.1   | 0.0   | 0.1   | 0.1   |
| Actinobacteriota | Cellulomonadaceae     | Actinotalea            | 0.0   | 0.1   | 0.3   | 0.6   | 0.0   | 0.0   | 0.0   | 0.0   | 0.0   | 0.0   | 0.0   | 0.0   | 0.0   | 0.0   | 0.0   | 0.0   |
| Actinobacteriota | Intrasporangiaceae    | Ornithinococcus        | 0.5   | 0.0   | 0.4   | 0.2   | 0.1   | 0.1   | 0.4   | 0.1   | 0.2   | 0.0   | 0.1   | 0.1   | 0.2   | 0.1   | 0.2   | 0.0   |
| Actinobacteriota | Micrococcaceae        | Nesterenkonia          | 2.8   | 0.7   | 0.5   | 0.5   | 0.2   | 0.2   | 1.3   | 0.5   | 1.1   | 0.3   | 0.2   | 0.3   | 0.4   | 0.2   | 0.4   | 0.2   |
| Bacteroidota     | Bacteroidetes BD2-2   | Bacteroidetes BD2-2    | 0.0   | 0.0   | 0.5   | 0.1   | 0.0   | 0.2   | 0.7   | 0.0   | 0.2   | 0.0   | 0.0   | 0.1   | 6.0   | 0.8   | 4.8   | 0.7   |
| Bacteroidota     | Prolixibacteraceae    | Draconibacterium       | 0.2   | 0.0   | 0.1   | 0.4   | 0.0   | 0.1   | 0.2   | 0.2   | 0.3   | 0.0   | 0.2   | 1.5   | 0.0   | 0.2   | 0.0   | 0.0   |
| Bacteroidota     | Prolixibacteraceae    | Prolixibacteraceae     | 0.1   | 0.3   | 0.1   | 0.0   | 0.4   | 1.1   | 0.1   | 0.0   | 0.0   | 0.2   | 0.3   | 0.7   | 0.3   | 0.7   | 0.3   | 0.4   |
| Bacteroidota     | Flavobacteriaceae     | Lutibacter             | 0.7   | 0.0   | 8.3   | 3.6   | 9.9   | 0.1   | 0.1   | 0.3   | 0.2   | 0.1   | 0.0   | 0.0   | 0.6   | 0.3   | 0.4   | 0.9   |
| Bacteroidota     | Lentimicrobiaceae     | Lentimicrobiaceae      | 1.5   | 0.1   | 0.3   | 0.1   | 0.2   | 13.1  | 0.1   | 0.1   | 0.4   | 0.2   | 0.1   | 0.1   | 1.5   | 8.8   | 0.8   | 0.6   |
| Campylobacterota | Arcobacteraceae       | Arcobacteraceae        | 0.5   | 0.5   | 5.0   | 0.7   | 0.3   | 0.3   | 0.3   | 0.0   | 0.1   | 0.0   | 6.1   | 0.4   | 0.1   | 0.4   | 0.2   | 0.2   |
| Campylobacterota | Arcobacteraceae       | Halarcobacter          | 0.2   | 1.5   | 2.4   | 1.0   | 0.0   | 0.0   | 0.1   | 0.0   | 1.1   | 0.0   | 4.2   | 0.5   | 0.1   | 0.2   | 0.2   | 0.0   |
| Campylobacterota | Arcobacteraceae       | Poseidonibacter        | 1.7   | 3.7   | 22.2  | 1.6   | 0.7   | 0.5   | 1.0   | 0.5   | 2.6   | 0.8   | 21.0  | 1.4   | 0.4   | 0.4   | 0.4   | 0.2   |
| Campylobacterota | Sulfurimonadaceae     | Sulfurimonas           | 0.0   | 0.0   | 0.2   | 0.2   | 0.0   | 0.0   | 0.0   | 0.0   | 0.2   | 0.0   | 0.1   | 0.1   | 0.0   | 0.0   | 0.0   | 0.0   |
| Campylobacterota | Sulfurovaceae         | Sulfurovum             | 0.3   | 0.2   | 0.2   | 0.0   | 0.1   | 0.0   | 0.0   | 0.1   | 0.2   | 0.0   | 0.1   | 0.1   | 0.0   | 0.0   | 0.0   | 0.1   |
| Chloroflexi      | Anaerolineaceae       | ADurb.Bin120           | 0.4   | 4.0   | 0.2   | 0.2   | 0.1   | 0.5   | 1.9   | 1.9   | 0.3   | 0.6   | 0.0   | 0.1   | 0.2   | 0.0   | 0.9   | 0.3   |
| Chloroflexi      | Anaerolineaceae       | Ornatilinea            | 0.0   | 0.0   | 0.0   | 0.0   | 0.1   | 0.0   | 0.0   | 0.0   | 0.0   | 0.0   | 0.9   | 0.9   | 0.3   | 0.1   | 0.6   | 0.1   |
| Chloroflexi      | Anaerolineaceae       | Pelolinea              | 0.0   | 0.0   | 0.0   | 0.0   | 1.2   | 0.0   | 0.0   | 0.0   | 0.0   | 0.0   | 0.0   | 0.0   | 0.3   | 0.0   | 0.6   | 0.1   |
| Chloroflexi      | JG30-KF-CM45          | JG30-KF-CM45           | 0.3   | 0.0   | 0.3   | 0.1   | 0.0   | 0.1   | 0.0   | 0.1   | 0.1   | 0.0   | 0.0   | 0.1   | 0.1   | 0.0   | 0.1   | 0.0   |
| Cyanobacteria    | Chloroplast           | Chloroplast            | 3.2   | 2.4   | 1.0   | 7.3   | 0.1   | 0.4   | 0.6   | 3.1   | 1.3   | 0.2   | 0.4   | 3.1   | 0.1   | 0.7   | 0.3   | 1.6   |
| Deferribacterota | Deferribacteraceae    | Denitrovibrio          | 0.0   | 0.7   | 0.1   | 0.0   | 0.0   | 0.1   | 0.0   | 0.0   | 0.1   | 0.0   | 0.0   | 0.0   | 0.0   | 0.0   | 0.0   | 0.0   |
| Desulfobacterota | Desulfobacteraceae    | Desulfobacter          | 7.4   | 2.6   | 2.6   | 0.7   | 30.7  | 0.8   | 4.7   | 29.0  | 17.4  | 1.1   | 1.6   | 1.5   | 4.6   | 0.7   | 0.9   | 0.7   |
| Desulfobacterota | Desulfobacteraceae    | Desulfobacteraceae     | 0.7   | 0.1   | 0.4   | 0.1   | 0.2   | 0.4   | 0.2   | 0.2   | 0.2   | 0.0   | 7.3   | 5.0   | 0.0   | 0.0   | 0.8   | 0.1   |
| Desulfobacterota | Desulfobacteraceae    | Desulfoconvexum        | 0.0   | 0.0   | 0.5   | 0.0   | 2.8   | 0.0   | 0.0   | 0.0   | 0.0   | 0.0   | 0.5   | 0.0   | 0.0   | 0.0   | 0.0   | 0.0   |
| Desulfobacterota | Desulfobacteraceae    | Desulfospira           | 0.0   | 0.0   | 0.0   | 0.0   | 0.9   | 0.0   | 0.0   | 0.0   | 0.0   | 0.0   | 0.0   | 0.0   | 1.7   | 0.0   | 2.4   | 0.2   |
| Desulfobacterota | Desulfobacteraceae    | Desulfotignum          | 0.0   | 14.7  | 0.1   | 0.0   | 0.0   | 0.4   | 0.0   | 0.0   | 0.0   | 2.7   | 0.0   | 0.0   | 0.0   | 0.2   | 0.2   | 0.2   |
| Desulfobacterota | Desulfolunaceae       | Desulfoluna            | 0.0   | 0.0   | 0.0   | 0.0   | 0.0   | 0.0   | 0.0   | 0.1   | 0.0   | 0.1   | 0.9   | 7.8   | 0.0   | 0.0   | 0.0   | 0.0   |
| Desulfobacterota | Desulfosarcinaceae    | Desulfatitalea         | 0.0   | 6.6   | 0.1   | 0.0   | 0.0   | 0.0   | 0.0   | 0.0   | 0.1   | 1.9   | 0.0   | 0.1   | 0.0   | 0.0   | 0.0   | 0.0   |
| Desulfobacterota | Desulfosarcinaceae    | Desulfonatronobacter   | 1.0   | 0.0   | 0.7   | 0.0   | 0.1   | 12.4  | 0.2   | 0.1   | 0.4   | 3.6   | 0.0   | 0.0   | 0.0   | 3.1   | 0.0   | 0.0   |
| Desulfobacterota | Desulfosarcinaceae    | Desulfosarcina         | 0.0   | 0.0   | 0.1   | 0.0   | 2.1   | 0.0   | 0.0   | 0.2   | 0.0   | 0.0   | 0.9   | 0.2   | 0.0   | 0.0   | 0.2   | 0.0   |
| Desulfobacterota | Desulfosarcinaceae    | Desulfosarcinaceae     | 1.1   | 0.2   | 1.5   | 33.2  | 0.3   | 0.3   | 0.4   | 0.3   | 0.5   | 0.1   | 0.6   | 3.8   | 0.2   | 0.5   | 0.4   | 0.4   |
| Desulfobacterota | Desulfosarcinaceae    | Sva0081 sediment group | 0.0   | 0.0   | 0.0   | 0.0   | 0.0   | 0.0   | 0.0   | 0.1   | 0.0   | 0.0   | 0.6   | 0.5   | 0.0   | 0.0   | 0.0   | 0.0   |
| Desulfobacterota | Desulfocapsaceae      | Desulfocapsaceae       | 0.4   | 0.0   | 0.2   | 0.4   | 0.3   | 0.0   | 0.4   | 2.5   | 0.6   | 0.3   | 0.0   | 0.2   | 3.1   | 1.5   | 0.0   | 0.3   |
| Desulfobacterota | Desulfocapsaceae      | Desulfopila            | 0.4   | 1.1   | 0.7   | 0.2   | 6.7   | 0.4   | 1.7   | 0.4   | 1.6   | 0.6   | 0.3   | 0.2   | 0.0   | 0.2   | 0.1   | 0.2   |
| Desulfobacterota | Desulfocapsaceae      | Desulfotalea           | 1.0   | 0.5   | 1.0   | 0.6   | 0.2   | 0.3   | 1.2   | 0.3   | 30.0  | 0.5   | 3.8   | 0.6   | 0.5   | 0.3   | 0.7   | 0.4   |
| Desulfobacterota | Desulfurivibrionaceae | MSBL7                  | 0.2   | 0.2   | 0.2   | 0.0   | 0.0   | 0.2   | 0.0   | 0.0   | 0.1   | 0.0   | 0.0   | 1.5   | 0.0   | 1.3   | 0.0   | 0.0   |
| Desulfobacterota | Desulfomicrobiaceae   | Desulfomicrobium       | 1.0   | 0.2   | 0.5   | 0.2   | 0.3   | 0.3   | 0.5   | 0.1   | 0.7   | 0.2   | 0.2   | 0.3   | 0.1   | 0.3   | 0.2   | 0.1   |
| Desulfobacterota | Desulfonatronaceae    | Desulfonatronum        | 3.6   | 0.3   | 1.4   | 0.7   | 0.5   | 43.2  | 1.2   | 0.5   | 0.9   | 2.6   | 0.9   | 0.5   | 0.6   | 8.9   | 0.5   | 0.6   |
| Desulfobacterota | Desulfonauticaceae    | Desulfonauticus        | 2.2   | 0.4   | 0.7   | 0.4   | 0.2   | 0.2   | 0.7   | 0.6   | 0.9   | 0.3   | 0.3   | 0.2   | 0.3   | 0.4   | 0.3   | 0.2   |
| Desulfobacterota | Desulfovibrionaceae   | Desulfovibrio          | 14.5  | 3.0   | 12.6  | 14.9  | 13.4  | 13.4  | 12.4  | 10.9  | 8.7   | 28.0  | 12.6  | 17.4  | 7.7   | 45.0  | 8.0   | 45.6  |
| Desulfobacterota | Desulfovibrionaceae   | Halodesulfovibrio      | 0.0   | 0.2   | 1.5   | 0.3   | 0.0   | 0.0   | 0.0   | 0.0   | 0.0   | 0.1   | 0.2   | 0.0   | 0.0   | 0.0   | 0.0   | 0.0   |
| Desulfobacterota | Sva1033               | Sva1033                | 0.0   | 0.0   | 0.0   | 0.0   | 0.0   | 0.0   | 0.0   | 0.0   | 0.1   | 0.0   | 0.0   | 0.0   | 0.0   | 0.0   | 0.0   | 0.0   |
| Desulfobacterota | Syntrophotaleaceae    | Syntrophotalea         | 2.0   | 1.3   | 3.0   | 1.6   | 0.3   | 0.2   | 0.6   | 0.4   | 1.3   | 0.3   | 9.8   | 1.1   | 1.9   | 0.7   | 0.0   | 0.2   |
| Elusimicrobiota  | Lineage IV            | Lineage IV             | 0.0   | 0.0   | 0.1   | 0.0   | 0.0   | 0.1   | 0.0   | 0.0   | 0.1   | 0.0   | 0.0   | 0.1   | 0.0   | 4.3   | 0.0   | 0.0   |

| Phylum          | Family                            | Genus                        | R1ph1 | R1ph2 | R2ph1 | R2ph2 | R3ph1 | R3ph2 | R4ph1 | R4ph2 | R5ph1 | R5ph2 | R6ph1 | R6ph2 | R7ph1 | R7ph2 | R8ph1 | R8ph2 |
|-----------------|-----------------------------------|------------------------------|-------|-------|-------|-------|-------|-------|-------|-------|-------|-------|-------|-------|-------|-------|-------|-------|
| Firmicutes      | Acholeplasmataceae                | Acholeplasma                 | 0.0   | 4.7   | 0.0   | 0.0   | 0.2   | 0.0   | 0.6   | 0.2   | 0.3   | 0.5   | 0.8   | 0.2   | 1.1   | 0.1   | 0.2   | 0.0   |
| Firmicutes      | Bacillaceae                       | Bacillaceae                  | 5.9   | 0.7   | 1.4   | 0.7   | 0.5   | 0.4   | 1.1   | 0.4   | 1.6   | 0.5   | 0.5   | 0.6   | 0.4   | 0.2   | 0.5   | 0.5   |
| Firmicutes      | Bacillaceae                       | Bacillus                     | 3.6   | 0.9   | 0.7   | 0.3   | 0.2   | 0.2   | 0.5   | 0.3   | 1.6   | 0.2   | 0.1   | 0.4   | 0.3   | 0.3   | 0.3   | 0.0   |
| Firmicutes      | Caldalkalibacillaceae             | Caldalkalibacillus           | 4.4   | 2.2   | 0.4   | 0.4   | 0.6   | 0.5   | 2.8   | 0.2   | 2.0   | 0.1   | 0.3   | 0.3   | 1.0   | 0.6   | 0.6   | 0.3   |
| Firmicutes      | Erysipelothricaceae               | Erysipelothrix               | 0.2   | 2.6   | 0.0   | 0.0   | 0.0   | 0.0   | 0.0   | 0.0   | 0.0   | 0.3   | 0.0   | 0.0   | 0.0   | 0.0   | 0.0   | 0.0   |
| Firmicutes      | Izemoplasmataceae                 | Izemoplasmataceae            | 0.3   | 0.1   | 0.2   | 0.0   | 0.2   | 0.0   | 0.7   | 0.1   | 0.4   | 0.0   | 0.8   | 1.9   | 0.0   | 0.2   | 2.4   | 1.6   |
| Firmicutes      | Izemoplasmataceae                 | Izimaplasma                  | 0.5   | 1.7   | 0.7   | 0.0   | 1.3   | 0.9   | 13.5  | 0.2   | 4.0   | 1.3   | 0.3   | 0.2   | 1.0   | 0.1   | 4.5   | 2.1   |
| Firmicutes      | Clostridia vadinBB60 group        | Clostridia vadinBB60 group   | 0.0   | 0.1   | 0.0   | 0.0   | 0.2   | 0.0   | 0.1   | 0.0   | 0.0   | 0.0   | 0.0   | 0.0   | 0.1   | 0.0   | 1.1   | 0.1   |
| Firmicutes      | Clostridiaceae                    | Clostridium sensu stricto 18 | 2.2   | 0.3   | 0.8   | 0.1   | 0.2   | 0.2   | 0.4   | 0.2   | 1.2   | 0.3   | 0.4   | 0.1   | 0.3   | 0.2   | 0.4   | 0.2   |
| Firmicutes      | Garciellaceae                     | Garciella                    | 4.8   | 0.9   | 2.2   | 0.5   | 0.8   | 0.9   | 0.9   | 0.8   | 2.5   | 0.7   | 1.0   | 0.8   | 0.7   | 0.6   | 0.7   | 0.8   |
| Firmicutes      | Hungateiclostridiaceae            | Ercella                      | 0.0   | 4.0   | 0.0   | 0.0   | 0.0   | 0.0   | 0.0   | 0.0   | 0.0   | 0.0   | 0.0   | 0.0   | 0.0   | 0.0   | 0.0   | 0.0   |
| Firmicutes      | Dethiosulfatibacteraceae          | Dethiosulfatibacter          | 0.1   | 9.2   | 0.1   | 0.0   | 0.0   | 0.0   | 0.0   | 0.0   | 0.1   | 1.9   | 0.0   | 0.0   | 0.0   | 0.1   | 0.0   | 0.0   |
| Firmicutes      | JTB215                            | JTB215                       | 0.0   | 0.0   | 0.1   | 0.0   | 0.0   | 0.0   | 0.0   | 0.0   | 0.0   | 0.0   | 0.7   | 0.1   | 0.0   | 0.0   | 0.0   | 0.0   |
| Firmicutes      | Thermincolaceae                   | Thermincola                  | 0.5   | 0.0   | 0.3   | 0.1   | 0.0   | 0.1   | 0.1   | 0.0   | 0.2   | 0.0   | 0.1   | 0.1   | 0.1   | 0.0   | 0.0   | 0.1   |
| Firmicutes      | Desulfotomaculales Incertae Sedis | Desulfallax-Sporotomaculum   | 2.3   | 0.2   | 0.3   | 0.1   | 0.1   | 0.2   | 0.4   | 0.1   | 0.8   | 0.3   | 0.1   | 0.3   | 0.1   | 0.1   | 0.3   | 0.1   |
| Firmicutes      | Firmicutes                        | Firmicutes                   | 0.3   | 0.1   | 0.3   | 0.1   | 0.0   | 0.1   | 0.1   | 0.0   | 0.1   | 0.0   | 0.1   | 1.1   | 0.0   | 0.0   | 0.0   | 0.0   |
| Firmicutes      | Thermolithobacteraceae            | Thermolithobacter            | 9.0   | 0.0   | 0.1   | 0.0   | 0.0   | 0.0   | 0.2   | 0.0   | 0.2   | 0.0   | 0.1   | 0.1   | 0.1   | 0.1   | 0.0   | 0.0   |
| Firmicutes      | Desulfitibacteraceae              | Desulfitibacter              | 1.0   | 0.2   | 0.6   | 0.2   | 0.1   | 0.2   | 0.2   | 0.0   | 0.8   | 0.4   | 0.3   | 28.6  | 0.3   | 0.2   | 0.2   | 0.1   |
| Firmicutes      | Thermacetogeniaceae               | Thermacetogeniaceae          | 2.4   | 0.0   | 0.3   | 0.0   | 0.0   | 0.1   | 0.1   | 0.1   | 0.7   | 0.0   | 0.1   | 0.1   | 0.1   | 0.1   | 0.3   | 0.0   |
| Patescibacteria | Absconditabacteriales (SR1)       | Absconditabacteriales (SR1)  | 0.0   | 0.0   | 0.1   | 0.0   | 0.0   | 0.0   | 0.0   | 0.0   | 0.0   | 0.0   | 0.0   | 0.0   | 0.0   | 0.3   | 0.0   | 0.0   |
| Proteobacteria  | Hyphomonadaceae                   | Hyphomonadaceae              | 0.0   | 0.0   | 0.1   | 0.0   | 0.0   | 0.0   | 3.8   | 1.0   | 0.3   | 0.0   | 0.0   | 0.0   | 0.0   | 0.0   | 0.2   | 0.0   |
| Proteobacteria  | Hyphomonadaceae                   | Hyphomonas                   | 0.1   | 0.2   | 0.2   | 0.4   | 2.2   | 0.0   | 2.1   | 0.0   | 0.2   | 0.1   | 0.6   | 0.7   | 0.8   | 0.0   | 0.1   | 0.1   |
| Proteobacteria  | Parvibaculaceae                   | Mf105b01                     | 0.0   | 2.8   | 0.0   | 0.0   | 0.1   | 0.0   | 0.0   | 1.1   | 0.0   | 0.0   | 0.0   | 0.0   | 0.0   | 0.1   | 0.1   | 0.3   |
| Proteobacteria  | Parvibaculaceae                   | Parvibaculum                 | 0.3   | 0.1   | 4.2   | 16.5  | 0.2   | 0.0   | 0.2   | 0.0   | 0.2   | 0.1   | 0.0   | 0.1   | 0.3   | 0.3   | 0.1   | 0.1   |
| Proteobacteria  | Rhizobiaceae                      | Cohaesibacter                | 0.0   | 0.3   | 0.3   | 0.0   | 1.1   | 0.1   | 1.6   | 0.7   | 0.0   | 0.0   | 1.6   | 0.4   | 0.3   | 0.1   | 0.4   | 0.0   |
| Proteobacteria  | Rhodobacteraceae                  | Paracoccus                   | 1.7   | 0.3   | 1.8   | 0.4   | 0.1   | 0.1   | 0.3   | 0.2   | 1.3   | 0.3   | 0.2   | 0.2   | 0.0   | 0.1   | 0.3   | 0.2   |
| Proteobacteria  | Rhodobacteraceae                  | Rhodobacteraceae             | 2.1   | 1.4   | 1.3   | 2.0   | 12.7  | 0.9   | 6.3   | 4.1   | 1.7   | 3.5   | 2.3   | 0.7   | 5.3   | 0.7   | 4.1   | 2.2   |
| Proteobacteria  | Rhodobacteraceae                  | Ruegeria                     | 0.0   | 0.2   | 0.2   | 3.0   | 0.0   | 0.0   | 0.0   | 0.0   | 0.0   | 0.0   | 0.0   | 0.0   | 0.6   | 0.0   | 0.0   | 0.0   |
| Proteobacteria  | AEGEAN-169 marine group           | AEGEAN-169 marine group      | 0.3   | 0.0   | 0.1   | 0.1   | 0.1   | 0.0   | 0.7   | 0.1   | 0.2   | 0.2   | 0.0   | 0.0   | 0.1   | 0.0   | 0.1   | 0.0   |
| Proteobacteria  | Magnetospiraceae                  | Magnetovibrio                | 3.0   | 0.9   | 2.0   | 0.9   | 2.9   | 1.7   | 22.0  | 23.2  | 2.0   | 0.9   | 1.3   | 0.6   | 46.1  | 4.6   | 49.6  | 25.2  |
| Proteobacteria  | Terasakiellaceae                  | Terasakiella                 | 0.1   | 0.5   | 0.8   | 0.2   | 0.0   | 0.0   | 0.0   | 0.0   | 0.2   | 0.0   | 0.6   | 0.7   | 0.0   | 0.0   | 0.0   | 0.0   |
| Proteobacteria  | Thalassospiraceae                 | Thalassospira                | 0.1   | 0.6   | 0.5   | 0.1   | 0.2   | 0.0   | 0.2   | 0.0   | 0.4   | 0.1   | 0.3   | 0.2   | 0.1   | 0.0   | 0.0   | 0.0   |
| Proteobacteria  | Sphingomonadaceae                 | Erythrobacter                | 0.5   | 0.0   | 0.5   | 0.1   | 0.2   | 0.1   | 0.1   | 0.1   | 0.3   | 0.1   | 0.2   | 0.2   | 3.5   | 0.7   | 1.9   | 0.7   |
| Proteobacteria  | Thalassobaculales                 | Thalassobaculales            | 0.1   | 0.0   | 0.0   | 0.0   | 0.1   | 0.0   | 0.4   | 0.2   | 0.1   | 0.0   | 0.0   | 0.3   | 0.2   | 0.1   | 0.2   | 0.1   |
| Proteobacteria  | CH2b56                            | CH2b56                       | 0.0   | 0.0   | 0.0   | 0.0   | 0.0   | 0.0   | 0.0   | 0.0   | 0.0   | 0.0   | 0.0   | 0.0   | 1.0   | 0.0   | 0.0   | 0.9   |
| Proteobacteria  | Sedimenticolaceae                 | Candidatus Thiodiazotropha   | 0.0   | 0.0   | 0.9   | 0.9   | 0.2   | 0.1   | 0.0   | 0.1   | 0.1   | 0.2   | 0.6   | 3.5   | 0.3   | 0.5   | 0.1   | 0.0   |
| Proteobacteria  | Thioalkalispiraceae               | Thiohalophilus               | 0.1   | 0.0   | 0.1   | 0.0   | 0.1   | 0.0   | 0.5   | 5.8   | 0.1   | 0.2   | 0.0   | 0.1   | 0.0   | 0.0   | 0.0   | 0.1   |
| Proteobacteria  | Pseudoalteromonadaceae            | Pseudoalteromonas            | 0.0   | 1.7   | 0.1   | 0.0   | 0.1   | 0.0   | 0.3   | 0.0   | 0.1   | 0.2   | 0.0   | 0.0   | 0.0   | 0.0   | 0.0   | 0.0   |
| Proteobacteria  | Shewanellaceae                    | Shewanella                   | 0.0   | 1.1   | 0.2   | 0.0   | 0.0   | 0.0   | 0.5   | 0.0   | 0.2   | 0.0   | 0.3   | 0.2   | 0.0   | 0.0   | 0.2   | 0.0   |
| Proteobacteria  | Vibrionaceae                      | Vibrio                       | 0.1   | 0.0   | 0.3   | 0.1   | 0.1   | 0.1   | 0.0   | 0.1   | 0.2   | 0.0   | 0.8   | 0.2   | 0.0   | 0.0   | 0.0   | 0.0   |
| Proteobacteria  | Unknown Family                    | Unknown Family               | 0.5   | 0.1   | 0.4   | 0.0   | 1.1   | 0.5   | 0.3   | 2.9   | 0.6   | 0.1   | 0.3   | 0.7   | 0.6   | 6.2   | 0.2   | 4.8   |
| Proteobacteria  | Immundisolibacteraceae            | Immundisolibacter            | 0.0   | 4.4   | 0.1   | 0.0   | 0.0   | 0.0   | 0.0   | 0.0   | 0.0   | 0.0   | 0.0   | 0.0   | 0.0   | 0.0   | 0.0   | 0.0   |
| Proteobacteria  | Halomonadaceae                    | Halomonas                    | 0.3   | 0.2   | 0.4   | 0.0   | 0.1   | 0.0   | 4.6   | 0.0   | 0.7   | 0.0   | 0.1   | 0.0   | 0.1   | 0.0   | 2.5   | 0.2   |
| Proteobacteria  | Marinobacteraceae                 | Marinobacter                 | 1.4   | 4.0   | 1.8   | 2.3   | 0.2   | 0.6   | 0.1   | 3.2   | 0.7   | 38.2  | 3.1   | 1.7   | 0.4   | 0.4   | 0.0   | 0.2   |
| Proteobacteria  | Moraxellaceae                     | Acinetobacter                | 0.0   | 0.0   | 0.1   | 0.0   | 0.0   | 0.1   | 0.0   | 0.1   | 0.0   | 0.0   | 0.0   | 0.0   | 0.0   | 0.0   | 0.0   | 0.2   |
| Proteobacteria  | Nitrincolaceae                    | Amphritea                    | 0.2   | 0.0   | 0.5   | 0.0   | 0.2   | 0.0   | 0.5   | 0.4   | 0.2   | 0.1   | 2.3   | 0.3   | 0.3   | 0.1   | 0.2   | 0.0   |
| Proteobacteria  | Nitrincolaceae                    | Marinobacterium              | 0.4   | 0.8   | 0.6   | 0.2   | 0.0   | 0.0   | 0.0   | 0.0   | 0.0   | 0.0   | 1.5   | 0.1   | 0.0   | 0.0   | 0.0   | 0.0   |
| Proteobacteria  | Nitrincolaceae                    | Neptunomonas                 | 0.0   | 0.2   | 0.3   | 0.1   | 0.0   | 0.0   | 0.0   | 0.0   | 0.2   | 0.0   | 2.9   | 0.1   | 0.0   | 0.0   | 0.0   | 0.0   |
| Proteobacteria  | Nitrincolaceae                    | Nitrincola                   | 0.0   | 1.7   | 0.3   | 0.0   | 0.0   | 0.0   | 0.0   | 0.0   | 0.0   | 0.0   | 3.7   | 0.0   | 0.0   | 0.0   | 0.0   | 0.0   |
| Proteobacteria  | Woeseiaceae                       | Woeseia                      | 0.0   | 0.3   | 0.1   | 0.0   | 0.0   | 0.0   | 0.0   | 0.0   | 0.0   | 0.0   | 0.0   | 0.0   | 0.0   | 0.0   | 0.0   | 0.0   |
| Proteobacteria  | Thiotrichaceae                    | Thiotrichaceae               | 0.1   | 0.0   | 0.0   | 0.0   | 0.0   | 0.0   | 0.0   | 0.1   | 0.0   | 0.0   | 0.0   | 0.0   | 0.0   | 0.0   | 0.0   | 0.0   |
| Spirochaetota   | Spirochaetaceae                   | Alkalispirochaeta            | 0.0   | 0.0   | 0.0   | 0.0   | 0.0   | 1.5   | 0.0   | 0.0   | 0.0   | 0.2   | 0.0   | 0.0   | 0.7   | 0.4   | 0.0   | 0.0   |
| Spirochaetota   | Spirochaetaceae                   | Sediminispirochaeta          | 0.0   | 0.2   | 0.0   | 0.0   | 0.2   | 0.1   | 0.0   | 0.0   | 0.1   | 0.0   | 0.5   | 1.2   | 0.1   | 0.0   | 0.4   | 0.2   |
| Spirochaetota   | Spirochaetaceae                   | Spirochaeta 2                | 0.0   | 0.0   | 0.0   | 0.0   | 0.0   | 0.0   | 0.0   | 0.0   | 0.0   | 0.0   | 0.0   | 0.0   | 0.0   | 0.0   | 0.0   | 0.1   |
| Thermotogota    | Kosmotogaceae                     | Kosmotoga                    | 0.8   | 0.4   | 0.5   | 0.1   | 0.2   | 0.1   | 0.3   | 0.4   | 0.4   | 0.2   | 0.3   | 0.2   | 0.2   | 0.2   | 0.2   | 0.1   |
