# Supplementary material for: Microbial Communities in Model Seawater-Compensated Fuel Ballast Tanks: Biodegradation and Biocorrosion Stimulated by Marine Sediments
Source: MDPI journal article supplement (doi:10.3390/cmd5010001), 2024-01-03
Supplement: s1 [file s1]

**Table S1.** Alpha diversity measurements for 16S rRNA amplicon libraries after rarefaction.

| <b>Sample</b> | <b>Number of Reads</b> | <b>Species richness (q=0)</b> | <b>Exponential Shannon (q=1)</b> | <b>Inverse Simpson (q=2)</b> |
|---------------|------------------------|-------------------------------|----------------------------------|------------------------------|
| SWph1         | 24963                  | 277                           | 85.6                             | 26.4                         |
| SWph1         | 24561                  | 268                           | 82.6                             | 26.3                         |
| SWph2         | 16888                  | 281                           | 72.1                             | 17.6                         |
| SWph2         | 18180                  | 281                           | 71.7                             | 17.3                         |
| R1ph1         | 855                    | 179                           | 49.3                             | 16.1                         |
| R1ph2         | 20356                  | 271                           | 91.1                             | 31.4                         |
| R2ph1         | 37823                  | 188                           | 32                               | 8.6                          |
| R2ph2         | 24418                  | 216                           | 34.1                             | 8.7                          |
| R3ph1         | 29576                  | 242                           | 58.5                             | 15.4                         |
| R3ph2         | 28172                  | 188                           | 28.4                             | 9                            |
| R4ph1         | 17634                  | 195                           | 43.4                             | 13.7                         |
| R4ph2         | 33412                  | 192                           | 27.6                             | 8.1                          |
| R5ph1         | 15300                  | 219                           | 21.1                             | 4.5                          |
| R5ph2         | 21991                  | 179                           | 25.2                             | 7.3                          |
| R6ph1         | 16285                  | 243                           | 77                               | 23.8                         |
| R6ph2         | 28650                  | 258                           | 59                               | 14                           |
| R7ph1         | 28190                  | 249                           | 39.7                             | 6.9                          |
| R7ph2         | 21255                  | 199                           | 44                               | 16.9                         |
| R8ph1         | 21887                  | 212                           | 28.5                             | 4.9                          |
| R8ph2         | 16235                  | 254                           | 39.8                             | 9                            |
| SED           | 9103                   | 457                           | 301.1                            | 157.7                        |
| SED           | 19669                  | 497                           | 325.9                            | 164.1                        |
| R1sed         | 23375                  | 396                           | 238                              | 118.5                        |
| R3sed         | 32158                  | 364                           | 171.3                            | 59.4                         |
| R4sed         | 23276                  | 297                           | 92.7                             | 27.7                         |
| R6sed         | 20479                  | 278                           | 92.9                             | 25.9                         |
| R7sed         | 25662                  | 348                           | 177.7                            | 80.1                         |
| R8sed         | 25455                  | 261                           | 68.7                             | 19.8                         |
| R1c2          | 20896                  | 233                           | 53.6                             | 14.7                         |
| R1c3          | 20644                  | 250                           | 63.8                             | 17.1                         |
| R2c1          | 17779                  | 228                           | 58.3                             | 18                           |
| R2c3          | 12846                  | 233                           | 67                               | 24                           |

|      |       |     |      |      |
|------|-------|-----|------|------|
| R3c1 | 22081 | 182 | 20.7 | 4.5  |
| R3c2 | 16935 | 179 | 18.6 | 4.1  |
| R3c3 | 26759 | 198 | 23.7 | 5.8  |
| R4c1 | 27371 | 194 | 32.9 | 10   |
| R4c2 | 18560 | 212 | 31.6 | 9.1  |
| R4c3 | 21267 | 207 | 28.6 | 8    |
| R5c1 | 19131 | 209 | 35.5 | 11.6 |
| R5c2 | 21391 | 193 | 31.5 | 10.5 |
| R5c3 | 21045 | 259 | 63.1 | 18.9 |
| R6c1 | 24226 | 262 | 99.3 | 38.8 |
| R6c2 | 13745 | 237 | 57.4 | 14.6 |
| R6c3 | 16588 | 249 | 80.3 | 29.6 |
| R7c1 | 19742 | 214 | 33.7 | 8.8  |
| R7c2 | 21832 | 215 | 29.3 | 7.6  |
| R7c3 | 17409 | 231 | 37.2 | 9    |
| R8c1 | 20650 | 212 | 25.5 | 5    |
| R8c2 | 15244 | 170 | 11.3 | 2.8  |
| R8c3 | 21990 | 182 | 14   | 3.2  |
