# Supplementary material for: Microbial Communities in Model Seawater-Compensated Fuel Ballast Tanks: Biodegradation and Biocorrosion Stimulated by Marine Sediments
Source: MDPI journal article supplement (doi:10.3390/cmd5010001), 2024-01-03
Supplement: s1 [file s1]

Table S3. Estimates of 16S rRNA gene copies using bacterial-archaeal primers S-D-Arch-0519-a-S-15 and S-D-Bact-0785-b-A-18 (Klindworth et al., 2012). R1, R2: petro F76; R3, R4: FT-F76; R5, R6: 1:1 mix of petro- and FT-F76; R7, R8: no added fuel. “-ph1”: Water samples taken day 400 after inoculation, immediately prior the addition of sediment. “-ph2”: Water samples taken day 764 after inoculation. Coupon and Sediment samples were taken 764 days after inoculation. \*: added sediment was not treated by autoclaving. NT: not tested. See materials and methods for more information.

| Reactor              | Water-ph1 (#/mL)   |                    | Water-ph2 (#/mL)   |                    | Coupon (#/g)       |                    | Sediment (#/g)     |                    |
|----------------------|--------------------|--------------------|--------------------|--------------------|--------------------|--------------------|--------------------|--------------------|
|                      | Avg                | ± 1 STD            |
| <b>R1* petro-F76</b> | $2.09 \times 10^3$ | $7.82 \times 10^2$ | $2.75 \times 10^4$ | $2.45 \times 10^3$ | $1.50 \times 10^6$ | $8.79 \times 10^4$ | $8.13 \times 10^5$ | $3.25 \times 10^5$ |
| <b>R2 petro-F76</b>  | $2.60 \times 10^5$ | $1.76 \times 10^4$ | $2.02 \times 10^5$ | $1.27 \times 10^4$ | $4.77 \times 10^5$ | $5.90 \times 10^4$ | $1.58 \times 10^5$ | $2.60 \times 10^4$ |
| <b>R3* FT-F76</b>    | $6.78 \times 10^4$ | $6.24 \times 10^3$ | $9.82 \times 10^4$ | $5.23 \times 10^3$ | $2.61 \times 10^6$ | $2.15 \times 10^5$ | $2.18 \times 10^6$ | $1.11 \times 10^6$ |
| <b>R4 FT-F76</b>     | $6.26 \times 10^3$ | $8.11 \times 10^2$ | $1.48 \times 10^5$ | $3.41 \times 10^3$ | $1.80 \times 10^6$ | $6.63 \times 10^5$ | $2.13 \times 10^6$ | $1.48 \times 10^5$ |
| <b>R5* fuel mix</b>  | $1.59 \times 10^4$ | $7.00 \times 10^3$ | $2.23 \times 10^5$ | $1.69 \times 10^4$ | $3.09 \times 10^6$ | $1.99 \times 10^5$ | $2.38 \times 10^6$ | $7.03 \times 10^5$ |
| <b>R6 fuel mix</b>   | $1.83 \times 10^5$ | $6.01 \times 10^4$ | $1.61 \times 10^5$ | $9.86 \times 10^3$ | $2.98 \times 10^5$ | $1.01 \times 10^5$ | $1.28 \times 10^6$ | $1.24 \times 10^5$ |
| <b>R7* no fuel</b>   | $6.98 \times 10^4$ | $2.51 \times 10^4$ | $1.76 \times 10^5$ | $5.50 \times 10^4$ | $7.87 \times 10^6$ | $3.23 \times 10^6$ | NT                 | NT                 |
| <b>R8 no fuel</b>    | $1.80 \times 10^5$ | $2.48 \times 10^4$ | $3.72 \times 10^4$ | $7.68 \times 10^3$ | $1.97 \times 10^6$ | $3.53 \times 10^5$ | $5.16 \times 10^6$ | $2.55 \times 10^5$ |
