# Supplementary material for: Microbial Communities in Model Seawater-Compensated Fuel Ballast Tanks: Biodegradation and Biocorrosion Stimulated by Marine Sediments
Source: MDPI journal article supplement (doi:10.3390/cmd5010001), 2024-01-03
Supplement: s1 [file s1]

Table S7: Summary of ONEWAY ANOVA post-hoc tests of microbial communities from coupons grouped according to whether or not they showed pitting corrosion. No pits: R7, R8 (no-fuel), R1, R2 (petro-F76). Pits: R3, R4 (FT-F76), R5, R6 (fuel mix). Dependent variables: relative abundance of the 100 genera in highest relative abundance. Mean: mean value of relative abundance, expressed as a percentage. Only taxa with significance level < 0.05% are shown.

|                                                         |                            |              | No pits      | Pits         |
|---------------------------------------------------------|----------------------------|--------------|--------------|--------------|
| <b>Class: genus (or other taxon)</b>                    | <b>F<sub>(1, 21)</sub></b> | <b>Sig.</b>  | <b>Mean</b>  | <b>Mean</b>  |
| <b>Acteothermia: <i>Acetothermiia</i></b>               | <b>8.672</b>               | <b>0.008</b> | <b>0.39</b>  | <b>0.05</b>  |
| <b>Acidimicrobiia: Actinomarinales</b>                  | <b>7.000</b>               | <b>0.015</b> | <b>0.04</b>  | <b>0.14</b>  |
| <b>Desulfobacteria: <i>Desulfosarcina</i></b>           | <b>4.574</b>               | <b>0.044</b> | <b>0.03</b>  | <b>0.42</b>  |
| <b>Desulfobulbia: <i>Desulfotalea</i></b>               | <b>4.597</b>               | <b>0.044</b> | <b>1.12</b>  | <b>3.25</b>  |
| <b>Desulfovibrionia: <i>Desulfovibrio</i></b>           | <b>6.892</b>               | <b>0.016</b> | <b>49.95</b> | <b>27.67</b> |
| <b>Bacilli: <i>Acholeplasma</i></b>                     | <b>8.439</b>               | <b>0.008</b> | <b>0.04</b>  | <b>0.14</b>  |
| <b>Gracilibacteria:<br/>Absconditabacteriales (SR1)</b> | <b>4.477</b>               | <b>0.046</b> | <b>0.23</b>  | <b>0.01</b>  |
