# Supplementary material for: Microbial Communities in Model Seawater-Compensated Fuel Ballast Tanks: Biodegradation and Biocorrosion Stimulated by Marine Sediments
Source: MDPI journal article supplement (doi:10.3390/cmd5010001), 2024-01-03
Supplement: s1 [file s1]

Archive with 9 entries (9 files):
- Figure S1 OCP pH.pdf
- Figure S2 EDX.pdf
- Table S1 Alpha diversity for amplicon libraries.pdf
- Table S2 Sulfur parameters.pdf
- Table S3 qPCR.pdf
- Table S4 Microbial community composition water samples .pdf
- Table S5 Microbial composition of sediment and coupon samples.pdf
- Table S6 ANOVA coupons grouped by fuel.pdf
- Table S7 ANOVA coupons with versus without pits.pdf
