# Supplementary material for: Microbial Communities in Model Seawater-Compensated Fuel Ballast Tanks: Biodegradation and Biocorrosion Stimulated by Marine Sediments
Source: MDPI journal article supplement (doi:10.3390/cmd5010001), 2024-01-03

Figure S1. Parameter measurements. R1, R2: petro F76 fuel. R3, R4: FT-F76 fuel. R5, R6: 1:1 mix of petro- and FT-F76 fuel. R7, R8: no fuel. (a) Open-circuit potential (OCP, mV relative to SHE). (b) pH. Sediment was added on day 400, first phase 2 sample was taken on day 402. Nonsterile sediment was added to Reactors 1, 3, 5, 7; autoclaved sediment was added to Reactors 2, 4, 6, and 8.

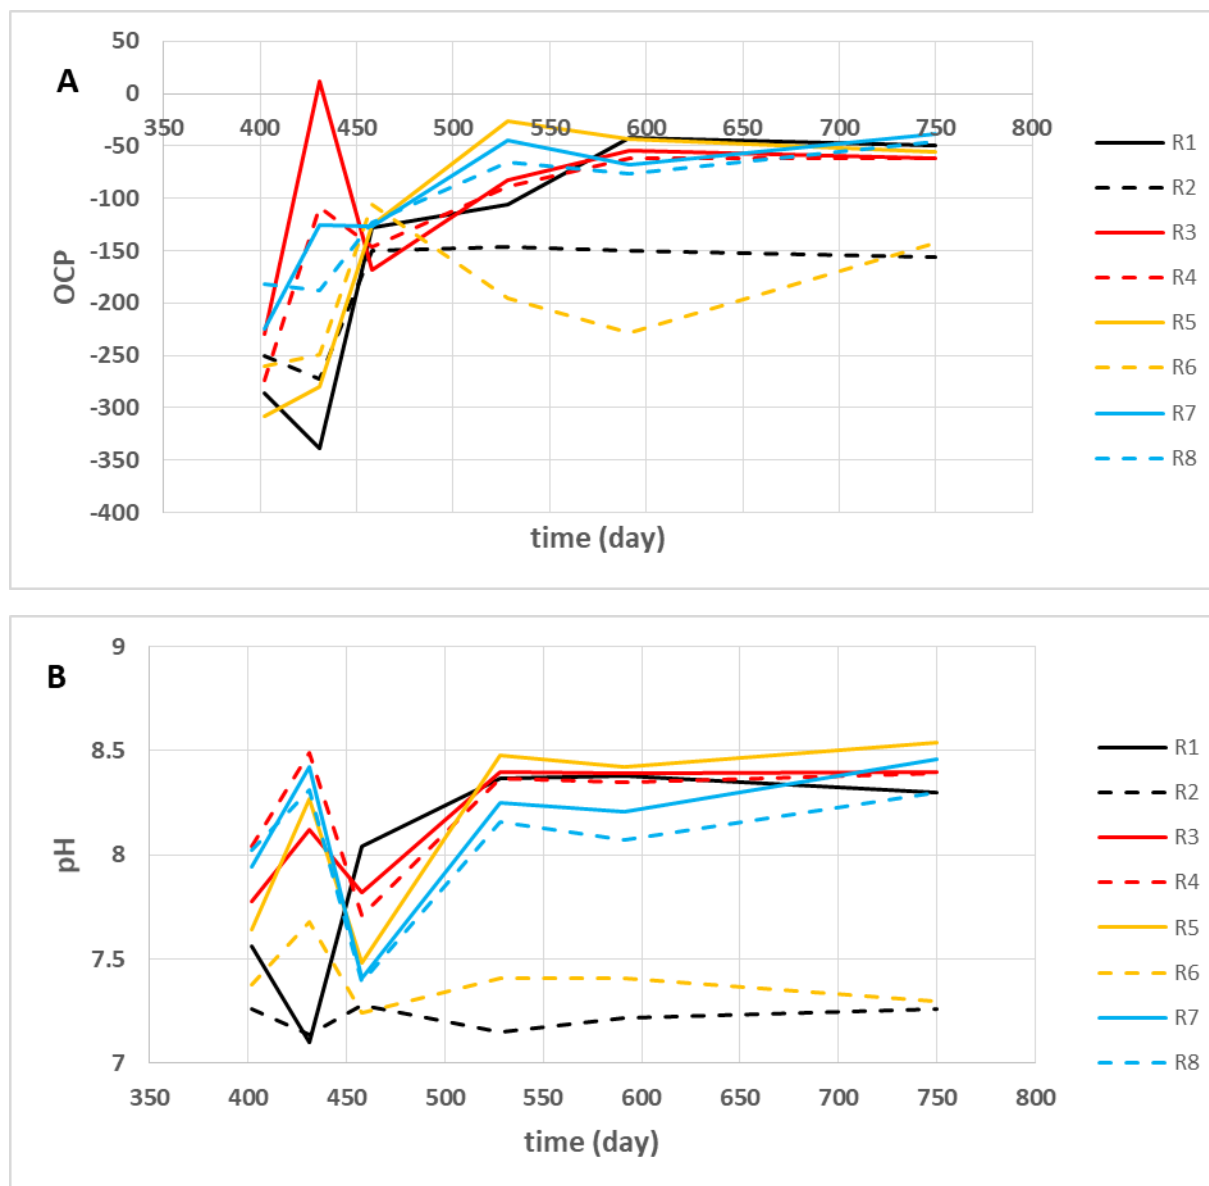

Supplement: s1 [file s1 › Figure S1 OCP pH.pdf]
