# Supplementary material for: Microbial Communities in Model Seawater-Compensated Fuel Ballast Tanks: Biodegradation and Biocorrosion Stimulated by Marine Sediments
Source: MDPI journal article supplement (doi:10.3390/cmd5010001), 2024-01-03
Supplement: s1 [file s1 › Table S6 ANOVA coupons grouped by fuel.pdf]

Table S6: Summary of ONEWAY ANOVA post-hoc tests of microbial communities from coupons grouped according to type of fuel in reactors. R7, R8: no-fuel. R1, R2: petro F76. R3, R4: FT-F76. R5, R6: fuel mix. Dependent variables: relative abundance of the 100 genera in highest relative abundance. Mean: mean value. Post-hoc test: significance level < 0.05%, Tukey HSD (2-sided) where no-fuel is the control group. Homogeneous groups are designated by the same letters (A, B). Only taxa with significance level < 0.05% are shown.

| <b>Reactors</b>                                   | <b>no fuel</b> | <b>petro-F76</b> | <b>FT-F76</b> | <b>fuel mix</b> |
|---------------------------------------------------|----------------|------------------|---------------|-----------------|
| <b>Class: genus (or other taxon)</b>              | <b>Mean</b>    | <b>Mean</b>      | <b>Mean</b>   | <b>Mean</b>     |
| <b>Acetothermia: <i>Acetothermia</i></b>          | <b>0.722</b>   | <b>0.000</b>     | <b>0.066</b>  | <b>0.044</b>    |
| <b>Homogeneous subsets</b>                        | <b>B</b>       | <b>A</b>         | <b>A</b>      | <b>A</b>        |
| <b>Actinobacteria: <i>Actinotalea</i></b>         | <b>0.020</b>   | <b>0.056</b>     | <b>0.153</b>  | <b>0.133</b>    |
| <b>Homogeneous subsets</b>                        | <b>A</b>       | <b>B</b>         | <b>A</b>      | <b>A</b>        |
| <b>Bacteroidia: Bacteroidetes BD2-2</b>           | <b>0.569</b>   | <b>0.000</b>     | <b>0.229</b>  | <b>0.196</b>    |
| <b>Homogeneous subsets</b>                        | <b>B</b>       | <b>A</b>         | <b>AB</b>     | <b>A</b>        |
| <b>Bacteroidia: Prolixibacteraceae</b>            | <b>0.168</b>   | <b>0.038</b>     | <b>0.112</b>  | <b>0.463</b>    |
| <b>Homogeneous subsets</b>                        | <b>AB</b>      | <b>A</b>         | <b>AB</b>     | <b>B</b>        |
| <b>Campylobacteria: Arcobacteraceae</b>           | <b>0.361</b>   | <b>2.207</b>     | <b>0.230</b>  | <b>0.993</b>    |
| <b>Homogeneous subsets</b>                        | <b>A</b>       | <b>B</b>         | <b>A</b>      | <b>A</b>        |
| <b>Campylobacteria: <i>Haloarcobacter</i></b>     | <b>0.082</b>   | <b>2.389</b>     | <b>0.229</b>  | <b>1.002</b>    |
| <b>Homogeneous subsets</b>                        | <b>A</b>       | <b>B</b>         | <b>A</b>      | <b>AB</b>       |
| <b>Campylobacteria: <i>Poseidonibacter</i></b>    | <b>0.627</b>   | <b>3.727</b>     | <b>0.847</b>  | <b>2.579</b>    |
| <b>Homogeneous subsets</b>                        | <b>A</b>       | <b>B</b>         | <b>A</b>      | <b>B</b>        |
| <b>Anaerolineae: ADurb.Bin120</b>                 | <b>0.203</b>   | <b>0.216</b>     | <b>3.659</b>  | <b>0.235</b>    |
| <b>Homogeneous subsets</b>                        | <b>A</b>       | <b>A</b>         | <b>B</b>      | <b>A</b>        |
| <b>Anaerolineae: <i>Ornatilinea</i></b>           | <b>0.132</b>   | <b>0.074</b>     | <b>0.010</b>  | <b>0.676</b>    |
| <b>Homogeneous subsets</b>                        | <b>AB</b>      | <b>AB</b>        | <b>A</b>      | <b>B</b>        |
| <b>Anaerolineae: <i>Pelolinea</i></b>             | <b>0.051</b>   | <b>0.000</b>     | <b>0.204</b>  | <b>0.044</b>    |
| <b>Homogeneous subsets</b>                        | <b>AB</b>      | <b>A</b>         | <b>B</b>      | <b>AB</b>       |
| <b>Deferrbacteres: <i>Denitrovibrio</i></b>       | <b>0.020</b>   | <b>0.558</b>     | <b>0.015</b>  | <b>0.068</b>    |
| <b>Homogeneous subsets</b>                        | <b>A</b>       | <b>B</b>         | <b>A</b>      | <b>AB</b>       |
| <b>Desulfobacteria: <i>Desulfoluna</i></b>        | <b>0.000</b>   | <b>0.062</b>     | <b>0.000</b>  | <b>0.885</b>    |
| <b>Homogeneous subsets</b>                        | <b>A</b>       | <b>AB</b>        | <b>A</b>      | <b>B</b>        |
| <b>Desulfobacteria: <i>Desulfatitalea</i></b>     | <b>0.000</b>   | <b>0.424</b>     | <b>0.000</b>  | <b>0.284</b>    |
| <b>Homogeneous subsets</b>                        | <b>A</b>       | <b>B</b>         | <b>A</b>      | <b>AB</b>       |
| <b>Desulfobacteria: <i>Desulfosarcina</i></b>     | <b>0.061</b>   | <b>0.000</b>     | <b>0.097</b>  | <b>0.750</b>    |
| <b>Homogeneous subsets</b>                        | <b>A</b>       | <b>A</b>         | <b>A</b>      | <b>B</b>        |
| <b>Desulfobacteria: Desulfosarcinaceae</b>        | <b>0.173</b>   | <b>5.950</b>     | <b>0.306</b>  | <b>1.533</b>    |
| <b>Homogeneous subsets</b>                        | <b>A</b>       | <b>B</b>         | <b>A</b>      | <b>AB</b>       |
| <b>Desulfovibrionia: <i>Desulfonatronum</i></b>   | <b>1.849</b>   | <b>1.480</b>     | <b>27.982</b> | <b>2.637</b>    |
| <b>Homogeneous subsets</b>                        | <b>A</b>       | <b>A</b>         | <b>B</b>      | <b>AB</b>       |
| <b>Desulfovibrionia: <i>Desulfovibrio</i></b>     | <b>73.655</b>  | <b>21.508</b>    | <b>24.996</b> | <b>30.345</b>   |
| <b>Homogeneous subsets</b>                        | <b>B</b>       | <b>A</b>         | <b>A</b>      | <b>A</b>        |
| <b>Desulfovibrionia: <i>Halodesulfovibrio</i></b> | <b>0.046</b>   | <b>0.501</b>     | <b>0.010</b>  | <b>0.005</b>    |
| <b>Homogeneous subsets</b>                        | <b>A</b>       | <b>B</b>         | <b>A</b>      | <b>A</b>        |
| <b>Desulfuromonadia: <i>Syntrophotalea</i></b>    | <b>0.571</b>   | <b>2.968</b>     | <b>0.455</b>  | <b>3.154</b>    |
| <b>Homogeneous subsets</b>                        | <b>A</b>       | <b>B</b>         | <b>A</b>      | <b>B</b>        |

| Reactors<br>Class: genus (or other taxon)   | no fuel<br>Mean | petro-F76<br>Mean | FT-F76<br>Mean | fuel mix<br>Mean |
|---------------------------------------------|-----------------|-------------------|----------------|------------------|
| Bacilli: <i>Bacillus</i>                    | 0.530           | 0.664             | 0.409          | 1.379            |
| Homogeneous subsets                         | A               | AB                | A              | B                |
| Bacilli: <i>Caldalkalibacillus</i>          | 0.411           | 1.836             | 0.664          | 2.287            |
| Homogeneous subsets                         | A               | AB                | A              | B                |
| Clostridia: JTB215                          | 0.000           | 0.225             | 0.000          | 0.814            |
| Homogeneous subsets                         | A               | AB                | A              | B                |
| Morellia: <i>Desulfitibacter</i>            | 0.000           | 0.803             | 0.005          | 0.216            |
| Homogeneous subsets                         | A               | A                 | A              | B                |
| Alphaproteobacteria: Rhodobacteraceae       | 0.479           | 1.340             | 1.101          | 1.374            |
| Homogeneous subsets                         | A               | AB                | AB             | B                |
| Alphaproteobacteria: <i>Ruegeria</i>        | 0.000           | 0.924             | 0.000          | 0.027            |
| Homogeneous subsets                         | A               | B                 | A              | A                |
| Gammaproteobacteria: <i>Shewanella</i>      | 0.000           | 0.156             | 0.000          | 0.101            |
| Homogeneous subsets                         | A               | B                 | A              | AB               |
| Gammaproteobacteria: UnknownGammaFamily     | 2.078           | 0.107             | 1.193          | 0.359            |
| Homogeneous subsets                         | B               | A                 | AB             | A                |
| Gammaproteobacteria: <i>Halomonas</i>       | 0.041           | 0.211             | 0.066          | 0.217            |
| Homogeneous subsets                         | A               | AB                | AB             | B                |
| Gammaproteobacteria: <i>Marinobacter</i>    | 0.132           | 1.590             | 0.500          | 1.702            |
| Homogeneous subsets                         | A               | B                 | A              | B                |
| Gammaproteobacteria: <i>Marinobacterium</i> | 0.000           | 1.058             | 0.000          | 0.195            |
| Homogeneous subsets                         | A               | B                 | A              | AB               |
| Gammaproteobacteria: <i>Neptunomonas</i>    | 0.000           | 0.119             | 0.000          | 0.569            |
| Homogeneous subsets                         | A               | AB                | A              | B                |
| Spirochaetia: <i>Sediminispirochaeta</i>    | 0.208           | 0.088             | 0.025          | 0.729            |
| Homogeneous subsets                         | AB              | AB                | A              | B                |
| Thermotogae: <i>Kosmotoga</i>               | 0.148           | 0.366             | 0.260          | 0.655            |
| Homogeneous subsets                         | A               | AB                | AB             | B                |
